# Supplementary material for: Emerging role of traditional birth attendants in mountainous terrain: a qualitative exploratory study from Chitral District, Pakistan
Source: PubMed Central journal article supplement — BMJ Open. 2014 Nov 26;4(11):e006238. doi: 10.1136/bmjopen-2014-006238 (PMC4248099; doi:10.1136/bmjopen-2014-006238), 2014-11-26
Supplement: bmjopen-2014-006238.draft_revisions.pdf [file bmjopen-2014-006238.draft_revisions.pdf]

# BMJ Open

## Emerging role of traditional birth attendants in mountainous terrain of Chitral District, Pakistan

|                                 |                                                                                                                                                                                                                                                                          |
|---------------------------------|--------------------------------------------------------------------------------------------------------------------------------------------------------------------------------------------------------------------------------------------------------------------------|
| Journal:                        | <i>BMJ Open</i>                                                                                                                                                                                                                                                          |
| Manuscript ID:                  | bmjopen-2014-006238                                                                                                                                                                                                                                                      |
| Article Type:                   | Research                                                                                                                                                                                                                                                                 |
| Date Submitted by the Author:   | 27-Jul-2014                                                                                                                                                                                                                                                              |
| Complete List of Authors:       | Shaikh, Babar; Aga Khan Foundation, Pakistan, Health & Built Environment Khan, Sharifullah; Aga Khan Foundation, Health & Built Environment Maab, Ayesha; Aga Khan Foundation, Health & Built Environment Amjad, Sohail; Aga Khan Foundation, Health & Built Environment |
| <b>Primary Subject Heading</b>: | Health services research                                                                                                                                                                                                                                                 |
| Secondary Subject Heading:      | Health policy, Obstetrics and gynaecology, Public health, Qualitative research, Reproductive medicine                                                                                                                                                                    |
| Keywords:                       | Health policy < HEALTH SERVICES ADMINISTRATION & MANAGEMENT, Organisation of health services < HEALTH SERVICES ADMINISTRATION & MANAGEMENT, Public health < INFECTIOUS DISEASES                                                                                          |
|                                 |                                                                                                                                                                                                                                                                          |

SCHOLARONE™  
Manuscripts

1  
2  
3 **Emerging role of traditional birth attendants in mountainous terrain of Chitral District, Pakistan**  
4  
5  
6

7 Babar Tasneem Shaikh, PhD, FRCP Edin - Aga Khan Foundation  
8

9 Sharifullah Khan, MPH - Aga Khan Foundation  
10

11 Ayesha Maab, MSc - Aga Khan Foundation  
12

13 Sohail Amjad, MPH - Aga Khan Foundation  
14  
15  
16  
17  
18

19 **Running title:** Role of traditional birth attendants  
20  
21  
22  
23  
24

25 **Corresponding author**  
26

27 **Dr Babar Tasneem Shaikh**  
28

29 Aga Khan Foundation (Pakistan)  
30

31 Level Nine, Serena Business Complex  
32

33 Khayaban-e-Suharwardy, Islamabad  
34

35 t: +92 51 111-253-254  
36

37 f: +92 51 2072552  
38

39 e: [shaikh.babar@gmail.com](mailto:shaikh.babar@gmail.com)  
40  
41  
42  
43  
44  
45  
46  
47  
48  
49  
50  
51  
52  
53  
54  
55  
56  
57  
58  
59  
60

**Abstract:**

**Introduction:** Shortage of health workforce is the major impediment in the achievement of health related MDGs 4 & 5. It is important to review strategies to maximize strengths of traditional birth attendants (TBAs) and skilled birth attendants in resource limited settings. However, role of TBAs in the provision of maternal, newborn and child health (MNCH) care has been a subject of discussion. This research endeavors to identify the role of TBAs in supporting the MNCH care, mainstreaming with the formal health system and their livelihood prospects.

**Methods:** A qualitative exploratory study was conducted in predominantly rural district Chitral, Pakistan. About seven Key informant interviews (KIIs) with health managers, and four focus group discussions (FGDs) were conducted with community midwives (CMWs), TBAs and member of Village Health Committee (VHC).

**Results:** The study identified that community has trust and faith in TBAs and her services. TBAs have had a pivotal role in health promotion activities such as breast feeding promotion and vaccination. TBAs conduct deliveries, and refer high risk cases to formal health system. With regard to CMW introduction in system, TBAs are positive and welcome this addition. Yet, their livelihood has suffered after CMWs deployment. Monetary incentives to them in recognition of referrals to CMWs could be one solution. There ought to be a meaningful interaction between the two cadres at the village level. VHC is an active forum for strengthening coordination between them and to ensure an alternate and permanent livelihood support system for the TBAs.

**Conclusion:** TBAs assuredly support the need for continuum of care for pregnant women, lactating mothers and children under five. The district health authorities must figure out ways to foster a healthy interface vis-à-vis roles and responsibilities of TBAs and CMWs.

**Keywords:** Maternal Newborn & Child Health, Traditional birth attendant, Community midwife, Qualitative research, Pakistan.

**Strengths & Limitations of the study**

Use of qualitative methods provided rich insight into women's interpretations and decision-making regarding health care seeking during and after pregnancy in a relatively conservative setting of Pakistan.

The findings represent a specific sample size, study site and socio-cultural milieu and therefore may not be generalized for the entire province or country.

For peer review only

## Introduction

Despite all advances toward MDGs 4 & 5, every year 6.6 million children die before five years of age (44% as newborns) and 289,000 maternal deaths occur, mostly from preventable causes (1). This state of affairs has raised serious global concern over the years in developing countries to ensure availability and accessibility of human resources for ensuring continuum of care for expecting mothers. Uniform availability and distribution of skilled birth attendants is critical to consider while looking at health service utilization trends (2). The Millennium Declaration in 2000 signed by 189 nations, recognized proportion of births assisted by trained birth as an important indicator to track maternal and child survival indicators (3,4). To increase the availability and accessibility of maternal and child health care services, training of TBAs and strengthening the partnership between community midwives (CMWs) and TBAs is widely acknowledged worldwide (5,6). Nonetheless, role of the TBAs cannot be effective in a weak primary health care system and in an unplanned referral mechanism (7).

In order to attain MDG-5, isolated interventions are not able to reduce maternal mortality sufficiently. It is important to review strategies to maximize strengths of TBAs as well and skilled birth attendants. Evidence suggests that skilled birth attendance has increased in regions where TBAs are integrated with the formal health system (8). However, integration of TBAs with the formal health system may require capacity development and supervision of TBAs, collaboration skills for health workers, involvement of TBAs at health facilities and, improved capacity on communication and referral systems. With this approach, TBAs may positively contribute to maternal and child health outcomes (9). Trainings of the TBAs not only enhance their knowledge and skills on obstetric care and referral mechanism, but also lead to greater community acceptance and a greater consumer satisfaction. They can play a vital role in birth preparedness and identification of danger signs (10). Training of TBAs has shown impact on perinatal and neonatal deaths which can be significantly reduced (11). Moreover, TBAs have been a critical contributor in providing skilled MNCH care in rural population of developing countries due to inadequate numbers of human resource for service delivery (12). Therefore, role of trained TBAs in healthcare provision cannot be undermined. Developing countries have used TBAs as a key strategy to improve maternal and child health care (13). They have been effective in improving referral mechanism and links

1  
2  
3 with the formal health care system (14). Literature review has suggested that a TBA is preferred over a  
4  
5 midwife who is young, unmarried girl and without children. This trend is more common in countries where  
6  
7 fresh CMWs are recently deployed such as Pakistan (15,16). Another reason for the community  
8  
9 acceptance of TBAs is that they are affordable option than professional midwives and she often accepts  
10  
11 payment in kind (17). Moreover, TBAs are always happy to make house visits, warranting mother's  
12  
13 privacy.

14  
15  
16  
17 Pakistan is among the few countries in South Asia that continues to have dismal maternal and child  
18  
19 health indicators. In Pakistan, Maternal Mortality Ratios (MMR) is high, ranging from 240 to 700 per  
20  
21 100,000 live births. The top three causes of maternal death are postpartum hemorrhage, eclampsia and  
22  
23 sepsis. Approximately two-thirds of all births (61%) take place at home due to limited access to health  
24  
25 facilities. Home based deliveries are usually attended by the TBA and now newly deployed community  
26  
27 midwives in some rural parts of the country (18). While some maternity care indicators appear to have  
28  
29 improved over the last two decades, women's access to prenatal health care continues to be low in  
30  
31 Pakistan<sup>18</sup>.

32  
33  
34  
35 Realizing the need for community health work force, Government of Pakistan launched the national  
36  
37 MNCH program in 2006 to help the rural women deliver safely (19). Although the program has been  
38  
39 successful in countries such as Malaysia and Indonesia, challenges faced by the CMW program of  
40  
41 Pakistan are multifaceted. These challenges are related to acceptance by community, competition with  
42  
43 other service providers, weak referral system, inadequate skill set and lack of community involvement  
44  
45 (20).

### 46 47 48 **The intervention**

49  
50 To address health system constraints, Chitral Child Survival Program (CCSP) of Aga Khan Foundation  
51  
52 Pakistan (AKF-P) deployed CMWs, supported community financing scheme, improved referral linkages  
53  
54 and implemented a behavior change communication campaign from 2008-2014. CCSP was implemented  
55  
56 in close partnership of Department of Health, Khyber Pakhtunkhwa, Aga Khan Health Services (AKHSP),  
57  
58  
59  
60

1  
2  
3 Pakistan and Aga Khan Rural Support Program (AKRSP). The CCSP interventions, especially the role of  
4 community based saving groups, village health committees (VHCs) and community based emergency  
5 maternal referral mechanism to achieve project results showed that CCSP had attempted to engage the  
6 TBAs proactively. The project empowered TBAs on Birth Preparedness and Complications Readiness  
7 (BPCR) plans and integrated referral mechanisms. Involvement of TBAs in the project was meaningful to  
8 generate the community acceptability for young CMWs, identification of high risk cases, and referrals of  
9 complications to CMW and transporting pregnant woman to health facility in time.  
10  
11  
12  
13  
14  
15  
16  
17  
18

19 This research endeavored to identify the role of TBAs in supporting the MNCH care, partnership  
20 mechanism with the formal health system and also explored livelihood options for TBAs.  
21  
22  
23  
24

## 25 **Methodology**

### 26 **a) Study site**

27  
28 The study was conducted in Chitral district, north western border of Pakistan, from March-April 2014.  
29  
30 The population of the intervention area is 200,000, about 57% of the total population of the district  
31 and residing in 243 villages. The government department of health and Aga Khan Health Services  
32 Pakistan (AKHSP) are the two primary formal sector healthcare providers in Chitral. The public-sector  
33 healthcare infrastructure in the district includes 22 civil dispensaries, 21 basic health units; three tehsil  
34 headquarters and one district headquarter hospital (21). AKHSP operates its own 32 health facilities  
35 in Chitral which include 17 health centers, eight family health centers, four dispensaries and three  
36 secondary care facilities, covering 60% of Chitral district. The MMR in the province is 275/100,000  
37 live births; whereas under five mortality is 75/1000 live births (18). Despite the presence of skilled  
38 birth attendants under MNCH program, large proportion of the deliveries is still attended by TBAs in  
39 Chitral district.  
40  
41  
42  
43  
44  
45  
46  
47  
48  
49  
50

### 51 **b) Study Design and data collection**

52  
53 The project documents and other relevant studies were thoroughly reviewed and the collated  
54 information guided to design the qualitative data collection instruments. A qualitative exploratory  
55  
56  
57  
58  
59  
60

study entailed seven KIIs and four FGDs conducted with different study participants. Field guides included open ended questions, covering topics such as role of TBAs in supporting MNCH care and CCSP project activities, community experience with TBAs, working relationships and linkages with the formal health system and sustainability/livelihood of TBAs. To ensure quality control, information collected through note-taking was cross-checked for completeness and consistency before and during data processing by the research team.

### c) *Study participants*

Community based health workers i.e. CMWs and TBAs; members of VHC and Community Based Saving Group (CBSG) were included in the discussion. The participants were encouraged by the moderator (PI) to interact with each other and comment on experiences and perceptions regarding role of TBAs, partnership with formal health system, and livelihood of TBAs. KIIs were conducted with two government health managers, two AKF-P managers, and three AKHSP managers. All the FGDs were conducted in the community; whereas KIIs were conducted in the respective offices of health managers. Table-1 presents the detail of the methods employed for the study.

**Table-1: Detail of methods employed in qualitative study**

| Cadre                                | Method | Total number of respondents | Area                                                                                                                                                                 |
|--------------------------------------|--------|-----------------------------|----------------------------------------------------------------------------------------------------------------------------------------------------------------------|
| CMWs                                 | FGD    | 10                          | Mori Lshat, Barini, Awi, Miragarm, Sore Laspoor, Raman, Terich Payeen, Lot Owir Bala, Lot Owir Payeen, Gohkir, Parsan, Owir Lasht Arkari, Besti Arkari, Khuz, Phashk |
| TBAs                                 | FGD    | 5                           | Lower Porth, Brock Kalaway, Porth Bala, Raman, Brock Baraman Deh                                                                                                     |
| VHC                                  | FGD    | 8                           | Morder                                                                                                                                                               |
| CBSG                                 | FGD    | 10                          | Morder                                                                                                                                                               |
| Health managers (AKHSP, AKF-P & DHD) | 7 KIIs | 07                          | Chitral city                                                                                                                                                         |

Purposive sampling technique was adopted, inviting the participation of those CMWs, and TBAs who had been serving actively in their local communities for the last two years. These health workers were identified with the help of health managers of AKHSP and government. Likewise, only those members of



1  
2  
3 VHC were invited for FGD, who had been active for the last two years. Each participant of the FGD and  
4  
5 KII was given the verbal information about the study by the research team and was given a consent form  
6  
7 prior to participation.  
8  
9

#### 10 11 **d) Data analysis**

12  
13 A qualitative content analysis was applied to analyze the information manually from all the FGDs and  
14  
15 KIIs. A stepwise approach was adopted for the content analysis. The analysis aimed at finding manifest  
16  
17 and latent meaning of data. The transcribed data was initially read several times by the principal  
18  
19 researcher in order to find the sense of the whole. At first stage the segmentation of information was done  
20  
21 i.e. segments and sub-segments of information were organized. Subsequently the significant information  
22  
23 was extracted which was related to research questions. At second stage the common views of the  
24  
25 respondents were put together at one place. At third stage, data was coded (different responses  
26  
27 highlighted) and then these codes were grouped into categories and abstracted into sub-themes and a  
28  
29 main theme. At final stage, the meanings of themes/descriptions were interpreted by keeping in view and  
30  
31 considering the cultural context of the participants.  
32  
33  
34

#### 35 **Results**

36  
37 The main theme which came out was the “emerging role of TBAs to improve Maternal, Newborn and  
38  
39 Child Health”. After content analysis, following sub-themes were identified:

- 40  
41 1. Community experience with CMWs and TBAs
  - 42  
43 2. View of participants on utilization of TBAs in formal health system
  - 44  
45 3. Role of TBAs in supporting obstetric care
  - 46  
47 4. Linkages and coordination among TBAs and CMWs
  - 48  
49 5. Livelihood of TBAs
- 50  
51  
52  
53  
54  
55  
56  
57  
58  
59  
60

**Table-2: Matrix of qualitative research analysis**

| Nodes                                         | Sub-nodes                                                                                                                                                                                                                                                                                                                                            |
|-----------------------------------------------|------------------------------------------------------------------------------------------------------------------------------------------------------------------------------------------------------------------------------------------------------------------------------------------------------------------------------------------------------|
| Community experience with CMWs and TBAs       | <ul style="list-style-type: none"> <li>- Availability of CMWs have empowered women for health care seeking</li> <li>- Community has trust and faith in TBAs and their services</li> </ul>                                                                                                                                                            |
| Linkage of TBAs with formal health system     | <ul style="list-style-type: none"> <li>-TBAs have pivotal role in health promotion activities such as health messages on breast feeding, mother and child immunization.</li> <li>-TBAs must assist CMW who is naïve to reproductive health matters.</li> <li>-TBAs can be involved in linking high risk cases to CMW and health facility.</li> </ul> |
| Role of TBAs in supporting obstetric care     | <ul style="list-style-type: none"> <li>- TBAs promote health messages for expecting mothers, assist CMW in delivery, identify expectant mothers with high risks, refer such cases to formal health system, and support post-natal care</li> </ul>                                                                                                    |
| Linkages and coordination among TBAs and CMWs | <ul style="list-style-type: none"> <li>- Mixed responses in terms of relationship between CMWs and TBAs</li> <li>- VHC is an active forum for coordination</li> <li>- Coordination is better at places where TBA gets some share of CMW income</li> </ul>                                                                                            |
| Livelihood of TBAs                            | <ul style="list-style-type: none"> <li>- CMWs could offer some incentives to TBAs to strengthen referrals and assistance in skilled delivery</li> <li>- VHCs decide TBA incentive share of CMW income</li> <li>- Community pay in kind contribution to recognize services of TBA</li> </ul>                                                          |

### Community experience with CMWs and TBAs

Availability of CMWs and the supportive role of TBAs in obstetric care has benefited communities, by and large. Most of the respondents shared that availability of CMWs has empowered women in order to seek essential and emergency obstetric care in rural communities. Members of VHC appreciated the binding relation of CMWs with TBAs. Despite availability of CMWs, the community members still have greater trust and faith in TBAs who live and deals with the village women since ages. Some of the respondents told that they avail services of TBAs due to her rich experience as compared to CMWs who are young and yet naïve to various reproductive health matters.

*“TBA still has the critical role as being more in proximity to the village women. She enjoys far more trust of the communities. She has a years’ long rapport with the families. People tend to follow her advice.”*

*(Director Health & Built Environment, AKF-P)*

1  
2  
3  
4  
5 *"I consider the role of TBAs important for two reasons; firstly they have been trusted by the communities,*  
6 *so they need to be taken on board for enhancing referrals to CMWs. Secondly, if they are not engaged*  
7 *properly then they will do more harm by doing deliveries and might spread negative propaganda too*  
8 *about the CMWs". (KII-AKF-P Senior Program Officer)*

9  
10  
11  
12  
13  
14  
15 *"I take my wife and child to CMW to see for medical help or treatment for maternal and child health*  
16 *problems? In our village, Dai (TBA) enjoys good relationship with the CMW". (FGD-VHC, Morder)"*

17  
18  
19  
20  
21 *"My family often seeks services from a TBA...she has all the experience." (FGD-VHC, Morder)*

22  
23  
24  
25 *"The TBAs are working since long time and they have developed trust in the communities". (KII, AKHSP*  
26 *Manager)*

### 27 28 29 30 31 **Linkage of TBAs with formal health system**

32 TBAs have pivotal role in health promotion activities such as health messages on nutrition, breast  
33 feeding, and vaccination promotion. Viewpoints of participants revealed that TBAs can be mainstreamed  
34 in a formal health system by assigning health promotion activities and for referring high risk cases to  
35 CMW and health facility.

36  
37  
38  
39  
40  
41  
42 *"The TBAs have role in referring of high risk cases and expectant mothers for delivery to CMWs. TBAs*  
43 *are also playing very good role in the community in identifying pregnant mothers during 1<sup>st</sup> trimester in the*  
44 *community, arranging TT vaccinations and providing education on nutrition during pregnancy." (GM,*  
45 *AKHSP)*

46  
47  
48  
49  
50  
51  
52 *"They (TBAs) must be linked with the formal health system especially for health promotion, referrals and*  
53 *assisting deliveries with CMWs, when needed" (FGD-VHC, Morder)*

### Role of TBAs in supporting obstetric care

TBAs have pivotal role in terms of identifying pregnancy related complications and assisting safe obstetric care services with CMWs. Traditionally, TBAs have been involved in the promotion of better nutrition practices for pregnant mothers, breastfeeding practices, TT vaccination of expectant mothers, prevention of neonatal hypothermia, and post-natal care including family planning. TBAs have a crucial role in strengthening referral and coordination mechanisms with CMWs and with the health facility. Findings of the KIIs and FGDs revealed that some TBAs were even involved in assisting deliveries with CMWs.

*“Many TBAs, no doubt have a sound folk wisdom, which can be used for various health promotion messages, especially where there is no other community health worker. Moreover, TBAs can be trained in providing antenatal care, TT vaccine, Misoprostol administration, recognizing the danger signs of pregnancy etc. This will give her a feeling that she still has a role to play in saving women’s lives.”*  
(Director Health & Built Environment, AKF-P)

*“TBAs promote breastfeeding and healthy nutritional practices in our community for mother and children; and they can keep on doing that”. (FGD-VHC, Morder)*

*“In my village, TBA assists delivery with me and refers cases to me. I have to say that she is of great help for me”. (FGD-CMWs, Parsan)*

*“They (TBAs) said, they do refer cases to them and in many cases have joined CMWs for conducting deliveries.” (KII-AKF-P Senior Program Officer)*

### Linkages and coordination mechanisms among TBAs and CMWs

Mixed responses were recorded with regards to linkages and coordination among TBAs and CMWs. There is no formal referral mechanism between TBAs and the CMWs. Lack of role clarity, physical inaccessibility, professional rivalry and few income opportunities are key factors for weak linkages between TBAs and CMWs. Some of the CMWs expressed that they encountered problems and

1  
2  
3 resistance from the TBAs and community during the initial phase of deployment. Village health committee  
4 shared that they invite both TBAs and CMWs in the VHC meetings. Performance of TBAs vis-à-vis skills  
5 related to maternal and newborn health is not satisfactory. Therefore, they now go to the CMWs who  
6 have adequate competency in knowledge and skills about the obstetric care. Some of the members  
7 shared that TBAs refer complicated expectant mothers to CMWs and health facility. In few instances, TBA  
8 was seen to be assisting the CMW in deliveries.  
9  
10  
11  
12  
13

14  
15  
16  
17 *“Rivalry; both are birth attendants; one is practicing by virtue of folk knowledge and the other is trained*  
18 *according to modern guidelines and WHO standards. So that has created a competition. At places, there*  
19 *is coordination too, where both are from the same family or where both have realized each other’s*  
20 *importance.” (Director Health & Built Environment, AKF-P)*  
21  
22  
23  
24

25  
26  
27 *“In some areas of intervention, the TBA perceived CMW as competitor.” (GM, AKHSP)*  
28  
29

30  
31 *“Many TBAs are in favor of CMWs because they cannot handle the complicated cases properly; yet some*  
32 *are against her. VHC is trying to bring the TBA as member in VHC and told them about the importance of*  
33 *deliveries by skilled hand and hygienic way.” (FGD-VHC, Morder)*  
34  
35  
36  
37

38  
39 *“We feel good about CMWs and think positively about them, majority still contact us, because the fee for*  
40 *CMWs is high”. (FGD-TBAs, Raman)*  
41

42  
43 *“I am satisfied with the services provided by CMW...I referred two cases to CMW”. (FGD-TBAs, Brock*  
44 *Kalaway)*  
45

46  
47  
48 *“Introduction of CMWs in the areas will limit the role of TBAs. To cope with this challenge the TBAs were*  
49 *included in the VHCs and the roles/responsibilities of the CMWs were communicated through this*  
50 *platform”. (KII, AKRSP Manager)*  
51  
52  
53  
54  
55  
56  
57  
58  
59  
60

1  
2  
3 *"The TBA in my area helps me in assisting delivery and refers cases to me." (FGD-CMWs, Terich*  
4  
5 *Payeen)*

6  
7  
8  
9 *"I faced resistance from the community at start....TBA was also not happy with my presence". (FGD-*  
10  
11 *CMWs, Khuz)*

12  
13  
14  
15 *"I think role clarity, distance and community trust on TBAs, income opportunity etc. are the main barriers*  
16  
17 *.These can be effectively dealt if AKHSP works with communities, CMWs and TBAs and set out a proper*  
18  
19 *coordination plan and play catalytic role to nurturing that symbiotic relationship." (KII-AKF-P, Senior*  
20  
21 *Program Officer)*

### 22 23 24 25 **Livelihood and sustainability of TBAs**

26 Supporting role of TBAs is very important; especially in context of difficult geographical terrains in Chitral.  
27 Various options as well as mechanisms were identified by the respondents, when asked about livelihood  
28 prospects of TBAs. Most of the respondents were of opinion that CMWs must pay some incentives to  
29 TBAs to strengthen referrals and assistance in skilled delivery. Findings of the KII revealed that one of the  
30 available forums to decide TBAs incentives is village committee. VHCs and other available forums such  
31 as Local Support organizations (LSOs) can play pivotal role in taking up such decisive role for supporting  
32 livelihood options for TBAs. Regarding payment to TBAs, some of the CMWs did not recompense TBAs.  
33 Some of the TBAs also told that they get in kind contributions and support for her services from the village  
34 families and not from the CMWs.

35  
36  
37  
38  
39  
40  
41  
42  
43  
44  
45 *"Let it be the VHC meeting to decide about some incentives to be given to TBAs from CMW fee, because*  
46  
47 *she will be referring every case to CMW. CMW should provide some money to TBA". (KII, AKHSP*  
48  
49 *Manager)*

50  
51  
52  
53 *"One of the CMW referred two cases to CMWs, and in fact she did join her for conducting the deliveries,*  
54  
55 *but in return did not get anything from the CMW and the family too." (KII-AKF-P, Senior Program Officer)*

1  
2  
3 “TBAs were providing delivery services before CMWs’ deployment; hence CMWs’ services will certainly affect  
4 their regular income (in cash or in kind). CMW should give incentive from her service fee to TBAs on each  
5 referral; whereas TBA can continue providing care to mother after delivery”. (KII, Manager, Programs AKHSP)  
6  
7  
8  
9

10  
11 “It is an informal arrangement between the two of them. Officially there is no binding on the CMW to pay TBA for  
12 referrals.” (Director Health & Built Environment, AKF-P)  
13  
14

15  
16  
17 “In our area, CMW is paying Rs200 to the TBA for each referral”. (FGD-VHC, Morder)  
18  
19

20  
21 “In two cases, I assisted CMW for delivery of a mother. CMW did not give me any money. I got some  
22 cash and chicken from the house of delivered mother”. (FGD-TBA, Lower Porth)  
23  
24  
25

## 26 27 Discussion

28  
29 The continued utilization of TBAs’ services in Chitral is attributed to several factors including the TBAs’  
30 proximity to several villages, TBAs’ respectful attitude toward the community, and flexible modes of  
31 payment (22,23). CMWs have been recently deployed in Chitral and experienced challenges and  
32 constraints by community based health providers and community itself in delivery of maternal health  
33 services (24,25,26). Evidence suggests that health management committees at the village level have  
34 been effective in reducing maternal complications through promoting linkages of health care providers  
35 with the community (27). The findings of our study also revealed that community forum in the form of VHC  
36 has played pivotal role in linking TBAs and CMWs with the community members.  
37  
38  
39  
40  
41  
42  
43  
44  
45

46  
47 Results of our study found that TBAs play vital role in improving maternal health such as diagnosing  
48 labor, assisting clean delivery with CMWs, detecting and referring maternal complications, and promoting  
49 health messages. While trained TBAs are not considered skilled birth attendants, their potential  
50 contribution in supporting maternal care has been recognized in low income and middle countries facing  
51 issues of human response scarcity (12, **Error! Bookmark not defined.**). Role of TBAs in administration of  
52 misoprostol to prevent postpartum hemorrhage in home-births is oft-advocated (28,29). Nevertheless, the  
53  
54  
55  
56  
57  
58  
59  
60

1  
2  
3 role of TBAs in supporting MNCH care cannot be neglected in settings where skilled birth attendants are  
4 fewer and new to health system. In the wake of reforms and the novel MNCH program of Pakistan, role of  
5 TBAs in improving maternal care and transforming health seeking behaviours ought to be promoted (30).  
6  
7 Defining her role and contribution in the continuum of care is linked to her livelihood and income  
8 generation.  
9  
10  
11  
12

13  
14  
15 Improved linkages and relationship among CMWs and TBAs is of essence to flourish referral system from  
16 community to health facility. Better coordination and collaboration of TBAs with CMWs was promoted  
17 under CCSP. TBA, who has a long standing link with local community, can act as a bridge to strengthen  
18 referral mechanism between community and the formal health system (15). Findings of the qualitative  
19 study follow other studies which demonstrated that a formal partnership program among TBAs and the  
20 skilled midwives has yet to be seen (5). While the importance of the TBAs role in referral is universally  
21 acknowledged, most health systems have not developed an effective referral mechanism. The CCSP  
22 project provided an enabling forum at the village level for CMWs and TBAs to interact and improve  
23 referral linkages. Such partnership is crucial to improve access to health care services, especially for  
24 communities living in the remote areas. Nevertheless, training and monitoring TBAs on MNCH care is  
25 imperative to minimize chances of malpractices (13).  
26  
27  
28  
29  
30  
31  
32  
33  
34  
35  
36  
37  
38

39 Financial constraints are a major risk to the livelihood of TBAs as evident from the findings of our study.  
40 Mostly they are receiving in kind payments by the family of expectant mothers; and a nominal payment by  
41 CMWs for each referral. Where TBAs did not receive any share from the CMWs, we found weak  
42 coordination mechanisms with the formal health system. Evidence suggests that in kind contributions by  
43 clients are the most common mode of payment by the clients (8,10). With the increasing use of TBAs in  
44 MNCH care, the question of compensation has become more pressing because these workers usually  
45 rely on rewards and in kind contributions by the clients (31). Continuing efforts to define the role of TBAs  
46 may benefit from an emphasis on their potential as active promoters of essential newborn care (32). In  
47 the context of Pakistan, the role of TBAs ought to be revisited and redefined, not only for the sake of trust  
48 of communities on her services, but also for her own livelihood.  
49  
50  
51  
52  
53  
54  
55  
56  
57  
58  
59  
60



## Conclusion

Prevailing poverty in the area calls for thinking solutions to ensure livelihood of TBAs, and to figure out an emerging role for her after the introduction of CMW in the health system. TBAs surely have solutions in the continuum of care for pregnant women, lactating mothers and children under five. They continue to take pride and see value in their role in the health system to support MNCH care. Health systems performance can be amplified by having a healthy interface between the TBAs and CMWs, and for the larger benefit of the communities served.

## Acknowledgement:

The authors acknowledge the facilitation and assistance provided by AKF-P, AKHSP and AKRSP to carry out field data collection.

## Ethical consideration:

Ethics approval for this study was granted by the Institutional Review Board of Aga Khan Health Services, Pakistan. Verbal informed consent was obtained from all the study participants, after explaining the objectives of the study. Confidentiality and anonymity was assured to all the participants. Data was kept under lock and key with the principal researcher.

## Authors' contributions

BTS and SAK conceived the study design and instruments. AM supervised the data collection and helped in analyses. BTS and SAK drafted the successive drafts of paper. SA conducted the critical review and added the intellectual content to the paper. All authors read and approved the final draft.

**Funding:** The study was a part of larger project "Chitral Child Survival Program" funded by USAID.

## Competing Interests

The authors declare that they have no competing interests.

## References

---

1. World Health Organization & UNICEF. Countdown to 2015 and beyond: fulfilling the health agenda for women and children. Geneva: 2014.
2. Shaikh BT. Marching toward the Millennium Development Goals: What about health systems, health-seeking behaviours and health service utilization in Pakistan? *World Health & Popul* 2008; 10(2): 44-52.
3. United Nations. Road map towards the implementation of the United Nations Millennium Declaration: report of the Secretary-General. New York: 2001.
4. Sachs JD, McArthur JW. The Millennium Project: a plan for meeting the Millennium Development Goals. *Lancet* 2005; 365(9456):347-53.
5. Titaley CR, Hunter CL, Dibley MJ, Heywood P. Why do some women still prefer traditional birth attendants and home delivery? A qualitative study on delivery care services in West Java Province, Indonesia. *BMC Pregnancy Childbirth* 2010, 10:43.
6. Lassi ZS, Haider BA, Bhutta ZA. Community-based intervention packages for reducing maternal and neonatal morbidity and mortality and improving neonatal outcomes. *Cochrane Database Syst Rev* 2010; 11: CD007754.
7. Garces A, McClure EM, Chomba E, Patel A, Pasha O, Tshetu A. Home birth attendants in low income countries: who are they and what do they do? *BMC Pregnancy Childbirth* 2012; 12:34.
8. Byrne A, Morgan A. How the integration of traditional birth attendants with formal health systems can increase skilled birth attendance. *Int J Gynaecol Obstet* 2011; 115(2):127-34.
9. Ray AM, Salihu HM. The impact of maternal mortality interventions using traditional birth attendants and village midwives. *J Obstet Gynaecol* 2004; 24(1):5-11.
10. Agarwal S, Sethi V, Srivastava K, Jha PK, Baqui AH. Birth preparedness and complication readiness among slum women in Indore City, India. *J Health Nutr Popul* 2010; 28(4): 383-391.
11. Wilson A, Gallos ID, Plana N, Lissauer D, Khan KS, Zamora J, et al. Effectiveness of strategies incorporating training and support of traditional birth attendants on perinatal and maternal mortality: meta-analysis. *BMJ* 2011; 343:d7102.

12. Sibley LM, Sipe TA. Transition to skilled birth attendance: Is there a future role for trained traditional birth attendants. *J Health Popul Nutr* 2006; 24(4):472-8.
13. Bisika T. The effectiveness of the TBA programme in reducing maternal mortality and morbidity in Malawi. *East Afr J Public Health* 2008; 5(2):103–10.
14. Chalo RN, Salihu HM, Nabukera S, Zirabamuzaale C. Referral of high-risk pregnant mothers by trained traditional birth attendants in Buikwe County, Mukono District, Uganda. *J Obstet Gynaecol* 2005; 25(6):554-7.
15. Temesgen TM, Umer JY, Buda DS, Haregu TN. Contribution of traditional birth attendants to the formal health system in Ethiopia: the case of Afar region. *Pan Afr Med J* 2012; 13(Suppl 1):15.
16. Wajid A, Rashid Z, Mir AM. Initial assessment of Community Midwives in rural Pakistan. PAIMAN. JSI Research and Training Institute, Inc; Islamabad: 2010.
17. Concern Worldwide. Examining the role of traditional birth attendants in the continuum of care in Sierra Leone. Innovations for maternal, newborn and child health. Policy Brief. Concern Worldwide; New York: 2013.
18. National Institute of Population Studies and Macro International Inc. Pakistan Demographic and Health Survey (PDHS) 2006–07. Government of Pakistan; Islamabad: 2008.
19. Government of Pakistan. PC1 National Maternal Newborn & Child health Program 2006-2012. Ministry of Health, Government of Pakistan; Islamabad: 2009.
20. Research and Development Solutions. The community midwives program in Pakistan. Policy Brief Series No 20. Islamabad: 2012.
21. Department of Health. District health profile-Chitral. Government of Khyber Pakhtunkhwa; Peshawar: 2014.
22. Chesney M, Davies S. Women's birth experiences in Pakistan – the importance of the Dai. The Royal College of Midwives. *Evid Based Midwifery* 2005; 3(1):26-32.
23. Owolabi OO, Glenton C, Lewin S, Pakenham-Walsh N. Stakeholder views on the incorporation of traditional birth attendants into the formal health systems of low-and middle-income countries: a qualitative analysis of the HIFA2015 and CHIL2015 email discussion forums. *BMC Pregnancy Childbirth* 2014; 14:118.

24. Sarfraz M, Hamid S. Challenges in delivery of skilled maternal care-experiences of community midwives in Pakistan. *BMC Pregnancy Childbirth* 2014; 14:59.
25. Research and Development Solutions. The community midwives program in Pakistan. Policy Brief Series No 20. Islamabad: USAID; 2012.
26. Research and Advocacy Fund/Children First. How far can I go? Social mobility of CMWs in Azad Kashmir. Islamabad: 2012.
27. Morrison J, Tumbahangphe KM, Budhathoki B, Neupane R, Sen A, Dahal K, et al. Community mobilization and health management committee strengthening to increase birth attendance by trained health workers in rural Makwanpur, Nepal: study protocol for a cluster randomized controlled trial. *Trials* 2011; 12:128.
28. Walraven G, Blum J, Dampha Y, Sowe M, Morison L, Winikoff B, et al. Misoprostol in the management of the third stage of labour in the home delivery setting in rural Gambia: a randomized controlled trial. *Br J Obstet Gynaecol* 2005; 112: 1277-83.
29. Mobeen N, Durocher J, Zuberi N, Jahan N, Blum J, Wasim S, et al. Administration of misoprostol by trained traditional birth attendants to prevent postpartum hemorrhage in homebirths in Pakistan: a randomized placebo-controlled trial. *BJOG* 2011; 118(3):353-61.
30. Shaikh BT, Haran D, Hatcher J. Women's social position and health-seeking behaviors: Is the health care system accessible and responsive in Pakistan? *Health Care Women Int* 2008; 29:945-959.
31. Gill CJ, Phiri-Mazala G, Guerina NG, Kasimba J, Mulenga C, MacLeod WB. Effect of training traditional birth attendants on neonatal mortality (Lufwanyama Neonatal Survival Project): randomized controlled study. *BMJ* 2011; 342:d346.
32. Falle TY, Mulany LC, Thatte N, Khatri SK, LeClerg SC, Darmstadt GL, et al. Potential role of traditional birth attendants in neonatal healthcare in rural southern Nepal. *J Health Popul Nutr* 2009; 27(1): 53-61.

# BMJ Open

## Emerging role of traditional birth attendants in mountainous terrain of Chitral District, Pakistan

|                                 |                                                                                                                                                                                                                                                                          |
|---------------------------------|--------------------------------------------------------------------------------------------------------------------------------------------------------------------------------------------------------------------------------------------------------------------------|
| Journal:                        | <i>BMJ Open</i>                                                                                                                                                                                                                                                          |
| Manuscript ID:                  | bmjopen-2014-006238.R1                                                                                                                                                                                                                                                   |
| Article Type:                   | Research                                                                                                                                                                                                                                                                 |
| Date Submitted by the Author:   | 10-Sep-2014                                                                                                                                                                                                                                                              |
| Complete List of Authors:       | Shaikh, Babar; Aga Khan Foundation, Pakistan, Health & Built Environment Khan, Sharifullah; Aga Khan Foundation, Health & Built Environment Maab, Ayesha; Aga Khan Foundation, Health & Built Environment Amjad, Sohail; Aga Khan Foundation, Health & Built Environment |
| <b>Primary Subject Heading</b>: | Health services research                                                                                                                                                                                                                                                 |
| Secondary Subject Heading:      | Health policy, Obstetrics and gynaecology, Public health, Qualitative research, Reproductive medicine                                                                                                                                                                    |
| Keywords:                       | Health policy < HEALTH SERVICES ADMINISTRATION & MANAGEMENT, Organisation of health services < HEALTH SERVICES ADMINISTRATION & MANAGEMENT, Public health < INFECTIOUS DISEASES                                                                                          |
|                                 |                                                                                                                                                                                                                                                                          |

SCHOLARONE™  
Manuscripts

1  
2  
3 **Emerging role of traditional birth attendants in mountainous terrain of Chitral District, Pakistan**  
4  
5  
6

7 Babar Tasneem Shaikh, MPH, PhD, FRCP Edin

8  
9 Sharifullah Khan, MPH

10  
11 Ayesha Maab, MSc

12  
13 Sohail Amjad, MA-HM, MA-HMPP  
14  
15  
16  
17  
18

19 **Running title:** Role of traditional birth attendants  
20  
21  
22  
23  
24

25 **Corresponding author**

26  
27 **Dr Babar Tasneem Shaikh**

28 Aga Khan Foundation (Pakistan)

29  
30 Level Nine, Serena Business Complex

31  
32 Khayaban-e-Suharwardy, Islamabad

33  
34 t: +92 51 111-253-254

35  
36 f: +92 51 2072552

37  
38 e: [shaikh.babar@gmail.com](mailto:shaikh.babar@gmail.com)  
39  
40  
41  
42  
43  
44  
45  
46  
47  
48  
49  
50  
51  
52  
53  
54  
55  
56  
57  
58  
59  
60

1  
2  
3 **Abstract:**  
4

5 **Objectives:** This research endeavors to re-define the role of TBAs in supporting the MNCH care now  
6 provided mainly by the trained community midwives (CMWs), to mainstream TBAs with the formal health  
7 system and to delineate their livelihood prospects, after the deployment and introduction of CMWs in the  
8 health system of Pakistan.  
9  
10  
11

12  
13  
14 **Setting:** The study was conducted in District Chitral, Khyber Pakhtunkhwa province, covering the areas  
15 where Chitral Child Survival programme was implemented.  
16  
17  
18

19  
20 **Participants:** A qualitative exploratory study was conducted, comprising seven Key informant interviews  
21 (KIIs) with health managers, and four focus group discussions (FGDs) with CMWs, TBAs and members  
22 of Village Health Committees (VHCs).  
23  
24  
25  
26  
27

28  
29 **Results:** The study identified that In the new scenario, after the introduction of CMW in the health  
30 system, TBAs still have a pivotal role in health promotion activities such as breast feeding promotion and  
31 vaccination. TBAs can assist CMWs in normal deliveries, and refer high risk cases to formal health  
32 system. Generally, TBAs are positive about CMWs' introduction and welcome this addition. Yet, their  
33 livelihood has suffered after CMWs deployment. Monetary incentives to them in recognition of referrals to  
34 CMWs could be one solution. VHC is an active forum for strengthening coordination between the two  
35 service providers and to ensure an alternate and permanent livelihood support system for the TBAs.  
36  
37  
38  
39  
40  
41  
42

43  
44 **Conclusion:** TBAs assured their continued support in provision of continuum of care for pregnant  
45 women, lactating mothers and children under five. The district health authorities must figure out ways to  
46 foster a healthy interface vis-à-vis roles and responsibilities of TBAs and CMWs. After some time, it would  
47 be worthwhile to do further research to look into the CMW's integration in the system, as well as TBA's  
48 continued role for provision of MNCH care.  
49  
50  
51  
52  
53  
54  
55  
56  
57  
58  
59  
60

1  
2  
3 **Keywords:** Maternal Newborn & Child Health, Traditional birth attendant, Community midwife, Qualitative  
4 research, Pakistan.  
5  
6  
7

8  
9 **Strengths & Limitations of the study**

10  
11 A study, first of its kind, which has expounded on the subject of TBAs role and livelihood after the  
12 introduction of trained MNCH providers in Pakistan. Use of qualitative methods provided rich insight into  
13 women's interpretations and decision-making regarding health care seeking during and after pregnancy in  
14 a relatively conservative setting of Pakistan. Study presents views of all stakeholders involved in the  
15 intervention.  
16  
17  
18  
19

20  
21  
22  
23 The findings represent a specific sample size, study site and socio-cultural milieu and therefore may not  
24 be generalized for the entire province or country. Health providers involved in the study were mainly from  
25 AKHSP and government who were already exposed to this intervention. Only few TBAs could be  
26 gathered for discussion, because most of them were remotely located, and weather and family  
27 constraints did not allow them to travel. Moreover, the prospective role of TBA is discussed in a special  
28 context, whereby a CMW was trained and deployed in the area for increasing skilled birth attendance.  
29  
30  
31  
32  
33  
34  
35  
36  
37  
38  
39  
40  
41  
42  
43  
44  
45  
46  
47  
48  
49  
50  
51  
52  
53  
54  
55  
56  
57  
58  
59  
60



## Introduction

Despite all advances toward MDGs 4 & 5, every year 6.6 million children die before five years of age (44% as newborns) and 289,000 maternal deaths occur, mostly from preventable causes (1). This state of affairs has raised serious global concern over the years in developing countries to ensure availability and accessibility of human resources for ensuring continuum of care for expecting mothers. Uniform availability and distribution of skilled birth attendants is critical to consider while looking at health service utilization trends (2). The Millennium Declaration in 2000 signed by 189 nations, recognized proportion of births assisted by trained birth as an important indicator to track maternal and child survival indicators (3,4). To increase the availability and accessibility of maternal and child health care services, training of TBAs and strengthening the partnership between community midwives (CMWs) and TBAs is widely acknowledged worldwide (5,6). Nonetheless, role of the TBAs cannot be effective in a weak primary health care system and in an unplanned referral mechanism (7).

In order to attain MDG-5, isolated interventions are not able to reduce maternal mortality sufficiently. It is important to review strategies to maximize strengths of TBAs as well and skilled birth attendants. Evidence suggests that skilled birth attendance has increased in regions where TBAs are integrated with the formal health system (8). However, integration of TBAs with the formal health system may require capacity development and supervision of TBAs, collaboration skills for health workers, involvement of TBAs at health facilities and, improved capacity on communication and referral systems. With this approach, TBAs may positively contribute to maternal and child health outcomes (9). Trainings of the TBAs not only enhance their knowledge and skills on obstetric care and referral mechanism, but also lead to greater community acceptance and a greater consumer satisfaction. They can play a vital role in birth preparedness and identification of danger signs (10). Training of TBAs has shown impact on perinatal and neonatal deaths which can be significantly reduced (11). Moreover, TBAs have been a critical contributor in providing skilled maternal, newborn and child health (MNCH) care in rural population of developing countries due to inadequate numbers of human resource for service delivery (12). Therefore, role of trained TBAs in healthcare provision cannot be undermined. Developing countries have used TBAs as a key strategy to improve maternal and child health care (13). They have been effective in

1  
2  
3 improving referral mechanism and links with the formal health care system (14). Literature review has  
4 suggested that a TBA is preferred over a midwife who is young, unmarried girl and without children. This  
5 trend is more common in countries where fresh CMWs are recently deployed such as Pakistan (15,16).  
6  
7 Another reason for the community acceptance of TBAs is that they are affordable option than professional  
8 midwives and she often accepts payment in kind (17). Moreover, TBAs are always happy to make house  
9 visits, warranting mother's privacy.  
10  
11  
12  
13  
14

15  
16  
17 Pakistan is among the few countries in South Asia that continues to have dismal maternal and child  
18 health indicators. In Pakistan, Maternal Mortality Ratios (MMR) is high, ranging from 240 to 700 per  
19 100,000 live births. The top three causes of maternal death are postpartum hemorrhage, eclampsia and  
20 sepsis. Approximately two-thirds of all births (61%) take place at home due to limited access to health  
21 facilities. Home based deliveries are usually attended by the TBA and now newly deployed community  
22 midwives in some rural parts of the country (18). While some maternity care indicators appear to have  
23 improved over the last two decades, women's access to prenatal health care continues to be low in  
24  
25  
26  
27  
28  
29  
30  
31 Pakistan<sup>18</sup>.  
32  
33

34  
35 Realizing the need for community health work force, Government of Pakistan launched the national  
36 MNCH program in 2006 to help the rural women deliver safely (19). Although the program has been  
37 successful in countries such as Malaysia and Indonesia, challenges faced by the CMW program of  
38 Pakistan are multifaceted. These challenges are related to acceptance by community, competition with  
39 other service providers, weak referral system, inadequate skill set and lack of community involvement  
40  
41  
42  
43  
44  
45 (20).  
46  
47

### 48 **The intervention**

49  
50 To address health system constraints, Chitral Child Survival Program (CCSP) of Aga Khan Foundation  
51 Pakistan (AKF-P) deployed CMWs, supported community financing scheme, improved referral linkages  
52 and implemented a behavior change communication campaign from 2008-2014. CCSP was implemented  
53  
54  
55  
56  
57 in close partnership of Department of Health, Khyber Pakhtunkhwa, Aga Khan Health Services Pakistan  
58  
59  
60

1  
2  
3 (AKHSP), and Aga Khan Rural Support Program (AKRSP). The CCSP interventions, especially the role of  
4 community based saving groups, village health committees (VHCs) and community based emergency  
5 maternal referral mechanism to achieve project results showed that CCSP had attempted to engage the  
6 TBAs proactively. The project empowered TBAs on Birth Preparedness and Complications Readiness  
7 (BPCR) plans and integrated referral mechanisms. Involvement of TBAs in the project was meaningful to  
8 generate the community acceptability for young CMWs, identification of high risk cases, and referrals of  
9 complications to CMW and transporting pregnant woman to health facility in time.  
10  
11  
12  
13  
14  
15  
16  
17  
18

19 This research endeavored to identify the role of TBAs in supporting the MNCH care, partnership  
20 mechanism with the formal health system and also explored livelihood options for TBAs.  
21  
22  
23  
24

## 25 **Methodology**

### 26 **a) Study site**

27  
28 The study was conducted in Chitral district, north western border of Pakistan, from March-April 2014.  
29 The population of the intervention area is 200,000, about 57% of the total population of the district  
30 and residing in 243 villages. The government department of health and Aga Khan Health Services  
31 Pakistan (AKHSP) are the two primary formal sector healthcare providers in Chitral. The public-sector  
32 healthcare infrastructure in the district includes 22 civil dispensaries, 21 basic health units; three tehsil  
33 headquarters and one district headquarter hospital (21). AKHSP operates its own 32 health facilities  
34 in Chitral which include 17 health centers, eight family health centers, four dispensaries and three  
35 secondary care facilities, covering 60% of Chitral district. The MMR in the province is 275/100,000  
36 live births; whereas under five mortality is 75/1000 live births (1849). Despite the presence of skilled  
37 birth attendants under MNCH program, large proportion of the deliveries is still attended by TBAs in  
38 Chitral district.  
39  
40  
41  
42  
43  
44  
45  
46  
47  
48  
49  
50  
51

### 52 **b) Study Design and data collection**

53  
54 The project documents and other relevant studies were thoroughly reviewed and the collated  
55 information guided to design the qualitative data collection instruments. A qualitative exploratory  
56  
57  
58  
59  
60

study entailed seven KIIs and four FGDs conducted with different study participants. The questions for focus group discussion (FGD) and key informants interview (KIIs) explore the role of TBAs in supporting MNCH care and CCSP project activities, community experience with TBAs, TBAs' relationship and coordination with the CMWs, referral of cases; remuneration and livelihood sources of TBAs; ways to engage TBAs in continuum of care, working relationships and linkages with the formal health system, and sustainability/livelihood of TBAs. Using a participation diagram in FGDs, it was ensured that all the participants must speak on each question. To ensure quality control, information collected through note-taking was cross-checked for completeness and consistency before and during data processing by the research team.

### c) *Study participants*

All the study participants were purposively sampled from the intervention areas in the district, with the help of the implementing agencies on ground. Community based health workers i.e. CMWs and TBAs; members of VHC and Community Based Saving Group (CBSG) were included in the discussion. The participants were encouraged by the moderator (PI) to interact with each other and comment on experiences and perceptions regarding role of TBAs, partnership with formal health system, and livelihood of TBAs. KIIs were conducted with two government health managers, two AKF-P managers, and three AKHSP managers. All the FGDs were conducted in the community; whereas KIIs were conducted in the respective offices of health managers. Table-1 presents the detail of the methods employed for the study.

**Table-1: Detail of methods employed in qualitative study**

| Cadre | Method | Total number of respondents | Village                                                                                                                                                              |
|-------|--------|-----------------------------|----------------------------------------------------------------------------------------------------------------------------------------------------------------------|
| CMWs  | FGD    | 10                          | Mori Lshat, Barini, Awi, Miragarm, Sore Laspoor, Raman, Terich Payeen, Lot Owir Bala, Lot Owir Payeen, Gohkir, Parsan, Owir Lasht Arkari, Besti Arkari, Khuz, Phashk |
| TBAs  | FGD    | 5                           | Lower Porth, Brock Kalaway, Porth Bala, Raman, Brock Baraman Deh                                                                                                     |
| VHC   | FGD    | 8                           | Morder                                                                                                                                                               |
| CBSG  | FGD    | 10                          | Morder                                                                                                                                                               |

|                                                   |        |    |              |
|---------------------------------------------------|--------|----|--------------|
| Health managers<br>(AKHSP, AKF-P<br>& Government) | 7 KIIs | 07 | Chitral city |
|---------------------------------------------------|--------|----|--------------|

Purposive sampling technique was adopted, inviting the participation of those CMWs, and TBAs who had been serving actively in their local communities for the last two years. These health workers were identified with the help of health managers of AKHSP and government. Likewise, only those members of VHC were invited for FGD, who had been active for the last two years. Each participant of the FGD and KII was given the verbal information about the study by the research team and was given a consent form prior to participation.

#### **d) Data analysis**

A qualitative content analysis was applied to analyze the information manually from all the FGDs and KIIs. A stepwise approach was adopted for the content analysis. The analysis aimed at finding manifest and latent meaning of data. The transcribed data was initially read several times by the principal researcher in order to find the sense of the whole. At first stage the segmentation of information was done i.e. segments and sub-segments of information were organized. Subsequently the significant information was extracted which was related to research questions. At second stage the common views of the respondents were put together at one place. At third stage, data was coded (different responses highlighted) and then these codes were grouped into categories and abstracted into sub-themes and a main theme. At final stage, the meanings of themes/descriptions were interpreted by keeping in view and considering the cultural context of the participants.

## **Results**

The main theme which came out was the “emerging role of TBAs to improve Maternal, Newborn and Child Health”. After content analysis, following sub-themes were identified as shown in Table 2:

1. Community experience with CMWs and TBAs
2. View of participants on utilization of TBAs in formal health system
3. Role of TBAs in supporting obstetric care
4. Linkages and coordination among TBAs and CMWs

## 5. Livelihood of TBAs

**Table-2: Matrix of qualitative research analysis**

| <b>Nodes</b>                                  | <b>Sub-nodes</b>                                                                                                                                                                                                                                                                                                                                     |
|-----------------------------------------------|------------------------------------------------------------------------------------------------------------------------------------------------------------------------------------------------------------------------------------------------------------------------------------------------------------------------------------------------------|
| Community experience with CMWs and TBAs       | <ul style="list-style-type: none"> <li>- Availability of CMWs have empowered women for health care seeking</li> <li>- Community has trust and faith in TBAs and their services</li> </ul>                                                                                                                                                            |
| Linkage of TBAs with formal health system     | <ul style="list-style-type: none"> <li>-TBAs have pivotal role in health promotion activities such as health messages on breast feeding, mother and child immunization.</li> <li>-TBAs must assist CMW who is naïve to reproductive health matters.</li> <li>-TBAs can be involved in linking high risk cases to CMW and health facility.</li> </ul> |
| Role of TBAs in supporting obstetric care     | <ul style="list-style-type: none"> <li>- TBAs assist CMW in delivery, identify expectant mothers with high risks, refer such cases to formal health system, and support post-natal care</li> </ul>                                                                                                                                                   |
| Linkages and coordination among TBAs and CMWs | <ul style="list-style-type: none"> <li>- Mixed responses in terms of relationship between CMWs and TBAs</li> <li>- VHC is an active forum for coordination</li> <li>- Coordination is better at places where TBA gets some share of CMW income</li> </ul>                                                                                            |
| Livelihood of TBAs                            | <ul style="list-style-type: none"> <li>- CMWs could offer some incentives to TBAs to strengthen referrals and assistance in skilled delivery</li> <li>- VHCs decide TBA incentive share of CMW income</li> <li>- Community pay in kind contribution to recognize services of TBA</li> </ul>                                                          |

**Community experience with CMWs and TBAs**

Availability of CMWs and the supportive role of TBAs in obstetric care have benefited communities, by and large. Most of the respondents shared that availability of CMWs has empowered women in order to seek essential and emergency obstetric care in rural communities. Members of VHC appreciated the binding relation of CMWs with TBAs. Despite availability of CMWs, the community members still have greater trust and faith in TBAs who live and deals with the village women since ages. Some of the respondents told that they avail services of TBAs due to her rich experience as compared to CMWs who are young and yet naïve to various reproductive health matters.

1  
2  
3 “TBA still has the critical role as being more in proximity to the village women. She enjoys far more trust of  
4 the communities. She has a years’ long rapport with the families. People tend to follow her advice.”  
5  
6  
7 (Director Health, AKF-P)  
8  
9

10  
11 “I consider the role of TBAs important for two reasons; firstly they have been trusted by the communities,  
12 so they need to be taken on board for enhancing referrals to CMWs. Secondly, if they are not engaged  
13 properly then they will do more harm by doing deliveries and might spread negative propaganda too  
14 about the CMWs”. (KII-AKF-P Senior Program Officer)  
15  
16  
17  
18

19  
20  
21 “I take my wife and child to CMW to see for medical help or treatment for maternal and child health  
22 problems? In our village, Dai (TBA) enjoys good relationship with the CMW”. (FGD-VHC, Morder)”  
23  
24  
25

26  
27 “My family often seeks services from a TBA...she has all the experience.” (FGD-VHC, Morder)  
28  
29

30  
31 “The TBAs are working since long time and they have developed trust in the communities”. (KII, AKHSP  
32 Manager)  
33  
34

### 35 36 37 **Linkage of TBAs with formal health system**

38 TBAs have pivotal role in health promotion activities such as health messages on nutrition, breast  
39 feeding, and vaccination promotion. Viewpoints of participants revealed that TBAs can be mainstreamed  
40 in a formal health system by assigning health promotion activities and for referring high risk cases to  
41 CMW and health facility.  
42  
43  
44  
45

46  
47  
48 “The TBAs have role in referring of high risk cases and expectant mothers for delivery to CMWs. TBAs  
49 are also playing very good role in the community in identifying pregnant mothers during 1<sup>st</sup> trimester in the  
50 community, arranging TT vaccinations and providing education on nutrition during pregnancy.” (GM,  
51 AKHSP)  
52  
53  
54  
55

1  
2  
3 *“They (TBAs) must be linked with the formal health system especially for health promotion, referrals and*  
4 *assisting deliveries with CMWs, when needed” (FGD-VHC, Morder)*  
5  
6  
7

### 8 9 **Role of TBAs in supporting obstetric care**

10 TBAs have pivotal role in terms of identifying pregnancy related complications and assisting safe obstetric  
11 care services with CMWs. Traditionally, TBAs have been involved in the promotion of better nutrition  
12 practices for pregnant mothers, breastfeeding practices, TT vaccination of expectant mothers, prevention  
13 of neonatal hypothermia, and post-natal care including family planning. TBAs have a crucial role in  
14 strengthening referral and coordination mechanisms with CMWs and with the health facility. Findings of  
15 the KIIs and FGDs revealed that some TBAs were even involved in assisting deliveries with CMWs.  
16  
17  
18  
19  
20  
21

22  
23  
24  
25 *“Many TBAs, no doubt have a sound folk wisdom, which can be used for various health promotion*  
26 *messages, especially where there is no other community health worker. Moreover, TBAs can be trained*  
27 *in providing antenatal care, TT vaccine, Misoprostol administration, recognizing the danger signs of*  
28 *pregnancy etc. This will give her a feeling that she still has a role to play in saving women’s lives.”*  
29 *(Director Health, AKF-P)*  
30  
31  
32  
33

34  
35  
36  
37 *“TBAs promote breastfeeding and healthy nutritional practices in our community for mother and children;*  
38 *and they can keep on doing that”. (FGD-VHC, Morder)*  
39  
40

41  
42  
43 *“In my village, TBA assists delivery with me and refers cases to me. I have to say that she is of great help*  
44 *for me”. (FGD-CMWs, Parsan)*  
45  
46

47  
48  
49 *“They (TBAs) said, they do refer cases to them and in many cases have joined CMWs for conducting*  
50 *deliveries.” (KII-AKF-P Senior Program Officer)*  
51  
52

### 53 54 **Linkages and coordination mechanisms among TBAs and CMWs**

55  
56  
57  
58  
59  
60



1  
2  
3 Lack of role clarity, physical inaccessibility, professional rivalry and few income opportunities are key  
4 factors for weak linkages between TBAs and CMWs. Some of the CMWs expressed that they  
5 encountered problems and resistance from the TBAs and community during the initial phase of  
6 deployment. Village health committee shared that they invite both TBAs and CMWs in the VHC meetings.  
7 Performance of TBAs vis-à-vis skills related to maternal and newborn health is not satisfactory. Therefore,  
8 they now go to the CMWs who have adequate competency in knowledge and skills about the obstetric  
9 care. Some of the members shared that TBAs refer complicated expectant mothers to CMWs and health  
10 facility. In few instances, TBA was seen to be assisting the CMW in deliveries.  
11  
12  
13  
14  
15  
16  
17  
18  
19  
20

21 *“Rivalry; both are birth attendants; one is practicing by virtue of folk knowledge and the other is trained*  
22 *according to modern guidelines and WHO standards. So that has created a competition. At places, there*  
23 *is coordination too, where both are from the same family or where both have realized each other’s*  
24 *importance.” (Director Health, AKF-P)*  
25  
26  
27  
28  
29  
30

31 *“The issues between TBA and CMW can be effectively dealt if AKHSP works with all stakeholders and set*  
32 *out a proper coordination plan, and play catalytic role to nurture a health relationship.” (KII-AKF-P, Senior*  
33 *Program Officer)*  
34  
35  
36  
37  
38

39 *“In some areas of intervention, the TBA perceived CMW as competitor.” (GM, AKHSP)*  
40  
41  
42

43 *“Introduction of CMWs in the areas will limit the role of TBAs. To cope with this challenge the TBAs were*  
44 *included in the VHCs and the roles/responsibilities of the CMWs were communicated through this*  
45 *platform”. (KII, AKRSP Manager)*  
46  
47  
48  
49

50 *“Many TBAs are in favor of CMWs because they cannot handle the complicated cases properly; yet some*  
51 *are against her. VHC is trying to bring the TBA as member in VHC and told them about the importance of*  
52 *deliveries by skilled hand and hygienic way.” (FGD-VHC, Morder)*  
53  
54  
55  
56  
57  
58  
59  
60

1  
2  
3 According to CMWs, they have high regard for the TBA, her experience and wisdom. They feel that TBA  
4 can complement their work. On the other hand, most TBAs are satisfied with CMWs work, skills and  
5 services rendered to the community women. Very few seem to be unhappy indeed.  
6  
7  
8  
9

### 10 11 **Livelihood and sustainability of TBAs**

12 Supporting role of TBAs is very important; especially in context of difficult geographical terrains in Chitral.  
13 Various options as well as mechanisms were identified by the respondents, when asked about livelihood  
14 prospects of TBAs. Most of the respondents were of opinion that CMWs must pay some incentives to  
15 TBAs to strengthen referrals and assistance in skilled delivery. Findings of the KII revealed that one of the  
16 available forums to decide TBAs incentives is village committee. VHCs and other available forums such  
17 as Local Support organizations (LSOs) can play pivotal role in taking up such decisive role for supporting  
18 livelihood options for TBAs. Regarding payment to TBAs, some of the CMWs did not recompense TBAs.  
19 Some of the TBAs also told that they get in kind contributions and support for her services from the village  
20 families and not from the CMWs.  
21  
22  
23  
24  
25  
26  
27  
28  
29  
30  
31  
32

33 *"It is an informal arrangement between the two of them. Officially there is no binding on the CMW to pay TBA for*  
34 *referrals."* (Director Health, AKF-P)  
35  
36  
37  
38

39 *"One of the CMW referred two cases to CMWs, and in fact she did join her for conducting the deliveries, but in*  
40 *return did not get anything from the CMW and the family too."* (KII-AKF-P, Senior Program Officer)  
41  
42  
43  
44

45 *"Let it be the VHC meeting to decide about some incentives to be given to TBAs from CMW fee, because*  
46 *she will be referring every case to CMW. CMW should provide some money to TBA".* (KII, AKHSP  
47 *Manager)*  
48  
49

50 *"TBAs were providing delivery services before CMWs' deployment; hence CMWs' services will certainly affect*  
51 *their regular income (in cash or in kind). CMW should give incentive from her service fee to TBAs on each*  
52 *referral; whereas TBA can continue providing care to mother after delivery".* (KII, Manager Programs, AKHSP)  
53  
54  
55  
56  
57  
58  
59  
60

1  
2  
3 *"In our area, CMW is paying Rs200 to the TBA for each referral". (FGD-VHC, Morder)*  
4  
5  
6

7 *"In two cases, I assisted CMW for delivery of a mother. CMW did not give me any money. I got some*  
8 *cash and chicken from the house of delivered mother". (FGD-TBA, Lower Porth)*  
9  
10

## 11 12 13 **Discussion**

14  
15 Though communities where CMWs are deployed after training are happy, yet the continued utilization of  
16 TBAs' services in Chitral. Fact is attributed to several factors including the TBAs' proximity to several  
17 villages, TBAs' respectful attitude toward the community, and flexible modes of payment (22,23). CMWs  
18 have been recently deployed in Chitral and experienced challenges and constraints by community based  
19 health providers and community itself in delivery of maternal health services (24,25). Evidence suggests  
20 that health management committees at the village level have been effective in reducing maternal  
21 complications through promoting linkages of health care providers with the community (26). The findings  
22 of our study also revealed that community forum in the form of VHC has played pivotal role in convincing  
23 the communities to avail CMW services and motivate the TBA to continue in supportive role in MNCH  
24 care. Awareness sessions have to be conducted on regular basis and on different forums to better  
25 inform the elder women and expecting mothers about the benefits of making use of skilled birth attendant  
26 i.e. CMW.  
27  
28  
29  
30  
31  
32  
33  
34  
35  
36  
37  
38  
39  
40

41 Results of our study found that TBAs play vital role in improving maternal health such as diagnosing  
42 labor, assisting clean delivery with CMWs, detecting and referring maternal complications, and promoting  
43 health messages. While trained TBAs are not considered skilled birth attendants, their potential  
44 contribution in supporting maternal care has been recognized in low income and middle countries facing  
45 issues of human response scarcity (12, [Error! Bookmark not defined.](#)<sup>13</sup>). Role of TBAs in administration  
46 of misoprostol to prevent postpartum hemorrhage in home-births is oft-advocated (27,28). Nevertheless,  
47 the role of TBAs in supporting MNCH care cannot be neglected in settings where skilled birth attendants  
48 are fewer and new to health system. In the wake of reforms and the novel MNCH program of Pakistan,  
49 role of TBAs in improving maternal care and transforming health seeking behaviours ought to be  
50  
51  
52  
53  
54  
55  
56  
57  
58  
59  
60

1  
2  
3 promoted (29). Defining her role and contribution in the continuum of care is linked to her livelihood and  
4  
5 income generation.  
6  
7

8  
9 Improved linkages and relationship among CMWs and TBAs is of essence to flourish referral system from  
10  
11 community to health facility. Better coordination and collaboration of TBAs with CMWs was promoted  
12  
13 under CCSP, by sensitizing the CMW on prospective role of TBA which will complement her services and  
14  
15 will help in building her rapport with the community. TBA, who has a long standing link with local  
16  
17 community, can act as a bridge to strengthen referral mechanism between community and the formal  
18  
19 health system (1524). Findings of the qualitative study follow other studies which demonstrated that a  
20  
21 formal partnership program among TBAs and the skilled midwives has yet to be seen (56) While the  
22  
23 importance of the TBAs role in referral is universally acknowledged, most health systems have not  
24  
25 developed an effective referral mechanism. The CCSP project provided an enabling forum at the village  
26  
27 level for CMWs and TBAs to interact and improve referral linkages. Such partnership is crucial to improve  
28  
29 access to health care services, especially for communities living in the remote areas. Nevertheless,  
30  
31 training and monitoring TBAs on MNCH care is imperative to minimize chances of malpractices (13).  
32  
33 Therefore, joint monitoring by AKHSP and government, by involving the village health committees could  
34  
35 be instrumental in this regard. Moreover, participatory monitoring is always less threatening; and hence  
36  
37 TBAs should be meaningfully engaged in such type of monitoring.  
38  
39

40  
41 Financial constraints are a major risk to the livelihood of TBAs as evident from the findings of our study.  
42  
43 Mostly they are receiving in kind payments by the family of expectant mothers; and a nominal payment by  
44  
45 CMWs for each referral. CMWs must keep a cushion of nominal payment to TBA, after verifying her  
46  
47 services. That will surely help in building a healthy relationship amongst the two service providers. Where  
48  
49 TBAs did not receive any share from the CMWs, we found weak coordination mechanisms with the formal  
50  
51 health system. Evidence suggests that in kind contributions by clients are the most common mode of  
52  
53 payment by the clients (89,1044). With the increasing use of TBAs in MNCH care, the question of  
54  
55 compensation has become more pressing because these workers usually rely on rewards and in kind  
56  
57 contributions by the clients (30). Continuing efforts to define the role of TBAs may benefit from an  
58  
59  
60

1  
2  
3 emphasis on their potential as active promoters of essential newborn care (31). In the context of Pakistan,  
4 the role of TBAs ought to be revisited and redefined, not only for the sake of trust of communities on her  
5 services, but also for her own livelihood.  
6  
7  
8  
9

### 10 11 **Conclusion**

12  
13 Prevailing poverty in the area calls for thinking solutions to ensure livelihood of TBAs, and to figure out an  
14 emerging role for her after the introduction of CMW in the health system. TBAs surely have solutions in  
15 the continuum of care for pregnant women, lactating mothers and children under five. They continue to  
16 take pride and see value in their role in the health system to support MNCH care. Health systems  
17 performance can be amplified by having a healthy interface between the TBAs and CMWs, and for the  
18 larger benefit of the communities served.  
19  
20  
21  
22  
23  
24  
25  
26

### 27 **Acknowledgement:**

28  
29 The authors acknowledge the facilitation and assistance provided by AKF-P, AKHSP and AKRSP to carry  
30 out field data collection.  
31  
32  
33  
34

### 35 **Ethical consideration:**

36  
37 Ethics approval for this study was granted by the Institutional Review Board of Aga Khan Health Services,  
38 Pakistan. Verbal informed consent was obtained from all the study participants, after explaining the  
39 objectives of the study. Confidentiality and anonymity was assured to all the participants. Data was kept  
40 under lock and key with the principal researcher.  
41  
42  
43  
44  
45

### 46 **Authors' contributions**

47  
48 BTS and SAK conceived the study design and instruments. AM supervised the data collection and helped  
49 in analyses. BTS and SAK drafted the successive drafts of paper. SA conducted the critical review and  
50 added the intellectual content to the paper. All authors read and approved the final draft.  
51  
52  
53  
54  
55

56 **Funding:** The study was a part of larger project "Chitral Child Survival Program" funded by USAID.  
57  
58  
59  
60

## Competing Interests

The authors declare that they have no competing interests.

## References

1. World Health Organization & UNICEF. Countdown to 2015 and beyond: fulfilling the health agenda for women and children. Geneva: 2014.
2. Shaikh BT. Marching toward the Millennium Development Goals: What about health systems, health-seeking behaviours and health service utilization in Pakistan? *World Health & Popul* 2008; 10(2): 44-52.
3. United Nations. Road map towards the implementation of the United Nations Millennium Declaration: report of the Secretary-General. New York: 2001.
4. Sachs JD, McArthur JW. The Millennium Project: a plan for meeting the Millennium Development Goals. *Lancet* 2005; 365(9456):347-53.
5. Titaley CR, Hunter CL, Dibley MJ, Heywood P. Why do some women still prefer traditional birth attendants and home delivery? A qualitative study on delivery care services in West Java Province, Indonesia. *BMC Pregnancy Childbirth* 2010; 10:43.
6. Lassi ZS, Haider BA, Bhutta ZA. Community-based intervention packages for reducing maternal and neonatal morbidity and mortality and improving neonatal outcomes. *Cochrane Database Syst Rev* 2010; 11: CD007754.
7. Garces A, McClure EM, Chomba E, Patel A, Pasha O, Tshefu A. Home birth attendants in low income countries: who are they and what do they do? *BMC Pregnancy Childbirth* 2012; 12:34.
8. Byrne A, Morgan A. How the integration of traditional birth attendants with formal health systems can increase skilled birth attendance. *Int J Gynaecol Obstet* 2011; 115(2):127-34.
9. Ray AM, Salihu HM. The impact of maternal mortality interventions using traditional birth attendants and village midwives. *J Obstet Gynaecol* 2004; 24(1):5-11.
10. Agarwal S, Sethi V, Srivastava K, Jha PK, Baqui AH. Birth preparedness and complication readiness among slum women in Indore City, India. *J Health Nutr Popul* 2010; 28(4): 383-391.

11. Wilson A, Gallos ID, Plana N, Lissauer D, Khan KS, Zamora J, et al. Effectiveness of strategies incorporating training and support of traditional birth attendants on perinatal and maternal mortality: meta-analysis. *BMJ* 2011; 343:d7102.
12. Sibley LM, Sipe TA. Transition to skilled birth attendance: Is there a future role for trained traditional birth attendants. *J Health Popul Nutr* 2006; 24(4):472-8.
13. Bisika T. The effectiveness of the TBA programme in reducing maternal mortality and morbidity in Malawi. *East Afr J Public Health* 2008; 5(2):103–10.
14. Chalo RN, Salihu HM, Nabukera S, Zirabamuzaale C. Referral of high-risk pregnant mothers by trained traditional birth attendants in Buikwe County, Mukono District, Uganda. *J Obstet Gynaecol* 2005; 25(6):554-7.
15. Temesgen TM, Umer JY, Buda DS, Haregu TN. Contribution of traditional birth attendants to the formal health system in Ethiopia: the case of Afar region. *Pan Afr Med J* 2012; 13(Suppl 1):15.
16. Wajid A, Rashid Z, Mir AM. Initial assessment of Community Midwives in rural Pakistan. PAIMAN. JSI Research and Training Institute, Inc; Islamabad: 2010.
17. Concern Worldwide. Examining the role of traditional birth attendants in the continuum of care in Sierra Leone. Innovations for maternal, newborn and child health. Policy Brief. Concern Worldwide; New York: 2013.
18. National Institute of Population Studies and Macro International Inc. Pakistan Demographic and Health Survey (PDHS) 2006–07. Government of Pakistan; Islamabad: 2008.
19. Government of Pakistan. PC1 National Maternal Newborn & Child health Program 2006-2012. Ministry of Health, Government of Pakistan; Islamabad: 2009.
20. Research and Development Solutions. The community midwives program in Pakistan. Policy Brief Series No 20. Islamabad: 2012.
21. Department of Health. District health profile-Chitral. Government of Khyber Pakhtunkhwa; Peshawar: 2014.
22. Chesney M, Davies S. Women's birth experiences in Pakistan – the importance of the Dai. The Royal College of Midwives. *Evid Based Midwifery* 2005; 3(1):26-32.



23. Owolabi OO, Glenton C, Lewin S, Pakenham-Walsh N. Stakeholder views on the incorporation of traditional birth attendants into the formal health systems of low-and middle-income countries: a qualitative analysis of the HIFA2015 and CHILD2015 email discussion forums. *BMC Pregnancy Childbirth* 2014; 14:118.
24. Sarfraz M, Hamid S. Challenges in delivery of skilled maternal care-Experiences of community midwives in Pakistan. *BMC Pregnancy Childbirth* 2014; 14:59.
25. Research and Advocacy Fund/Children First. How far can I go? Social mobility of CMWs in Azad Kashmir. Islamabad: 2012.
26. Morrison J, Tumbahangphe KM, Budhathoki B, Neupane R, Sen A, Dahal K, et al. Community mobilization and health management committee strengthening to increase birth attendance by trained health workers in rural Makwanpur, Nepal: study protocol for a cluster randomized controlled trial. *Trials* 2011; 12:128.
27. Walraven G, Blum J, Dampha Y, Sowe M, Morison L, Winikoff B, et al. Misoprostol in the management of the third stage of labour in the home delivery setting in rural Gambia: a randomized controlled trial. *Br J Obstet Gynaecol* 2005; 112: 1277-83.
28. Mobeen N, Durocher J, Zuberi N, Jahan N, Blum J, Wasim S, et al. Administration of misoprostol by trained traditional birth attendants to prevent postpartum hemorrhage in homebirths in Pakistan: a randomized placebo-controlled trial. *BJOG* 2011; 118(3):353-61.
29. Shaikh BT, Haran D, Hatcher J. Women's social position and health-seeking behaviors: Is the health care system accessible and responsive in Pakistan? *Health Care Women Int* 2008; 29:945-959.
30. Gill CJ, Phiri-Mazala G, Guerina NG, Kasimba J, Mulenga C, MacLeod WB. Effect of training traditional birth attendants on neonatal mortality (Lufwanyama Neonatal Survival Project): randomized controlled study. *BMJ* 2011; 342:d346.
31. Falle TY, Mulany LC, Thatte N, Khatri SK, LeClerg SC, Darmstadt GL, et al. Potential role of traditional birth attendants in neonatal healthcare in rural southern Nepal. *J Health Popul Nutr* 2009; 27(1): 53-61.



1  
2  
3  
4  
5  
6  
7  
8  
9 **Emerging role of traditional birth attendants in mountainous terrain of Chitral District, Pakistan**

10  
11 Babar Tasneem Shaikh, MPH, PhD, FRCP Edin

12 Sharifullah Khan, MPH

13 Ayesha Maab, MSc

14 Sohail Amjad, MA-HM, MA-HMPP

15  
16  
17  
18  
19  
20  
21 **Running title:** Role of traditional birth attendants

22  
23  
24  
25  
26 **Corresponding author**

27 **Dr Babar Tasneem Shaikh**

28 Aga Khan Foundation (Pakistan)

29 Level Nine, Serena Business Complex

30 Khayaban-e-Suharwardy, Islamabad

31 t: +92 51 111-253-254

32 f: +92 51 2072552

33 e: [shaikh.babar@gmail.com](mailto:shaikh.babar@gmail.com)

1  
2  
3  
4  
5  
6  
7  
8  
9  
10  
11  
12  
13  
14  
15  
16  
17  
18  
19  
20  
21  
22  
23  
24  
25  
26  
27  
28  
29  
30  
31  
32  
33  
34  
35  
36  
37  
38  
39  
40  
41  
42  
43  
44  
45  
46  
47  
48  
49  
50  
51  
52  
53  
54  
55  
56  
57  
58  
59  
60**Abstract:**

**IntroductionObjectives:** Shortage of health workforce is the major impediment in the achievement of health related MDGs 4 & 5. It is important to review strategies to maximize strengths of traditional birth attendants (TBAs) and skilled birth attendants in resource limited settings. However, role of TBAs in the provision of maternal, newborn and child health (MNCH) care has been a subject of discussion. This research endeavors to identifyre-define the role of TBAs in supporting the MNCH care now provided mainly by the trained community midwives (CMWs), to mainstreaming TBAs with the formal health system and to delineate their livelihood prospects, after the deployment and introduction of CMWs in the health system of Pakistan.

**Setting:** The study was conducted in District Chitral, Khyber Pakhtunkhwa province, covering the areas where Chitral Child Survival programme was implemented.

**MethodsParticipants:** A qualitative exploratory study was conducted, comprising in predominantly rural district Chitral, Pakistan. About seven Key informant interviews (KIIs) with health managers, and four focus group discussions (FGDs) were conducted with community midwives (CMWs), TBAs and members of Village Health Committees (VHCs).

**Results:** The study identified that community has trust and faith in TBAs and her services. In the new scenario, after the introduction of CMW in the health system, TBAs still have had a pivotal role in health promotion activities such as breast feeding promotion and vaccination. TBAs can assist conduct CMWs in normal deliveries, and refer high risk cases to formal health system. With regard to CMW introduction in system, Generally, TBAs are positive about CMWs' introduction and welcome this addition. Yet, their livelihood has suffered after CMWs deployment. Monetary incentives to them in recognition of referrals to CMWs could be one solution. There ought to be a meaningful interaction between the two cadres at the village level. VHC is an active forum for strengthening coordination between the m two service providers and to ensure an alternate and permanent livelihood support system for the TBAs.

**Conclusion:** TBAs assured their continuedly support in provision of the need for continuum of care for pregnant women, lactating mothers and children under five. The district health authorities must figure out ways to foster a healthy interface vis-à-vis roles and responsibilities of TBAs and CMWs. After some time,

Formatted: Font: Not Bold

Formatted: Font: Not Bold

1  
2  
3  
4  
5  
6  
7  
8  
9 [it would be worthwhile to do further research to look into the CMW's integration in the system, as well as](#)  
10 [TBA's continued role for provision of MNCH care.](#)  
11

12  
13 **Keywords:** Maternal Newborn & Child Health, Traditional birth attendant, Community midwife, Qualitative  
14 research, Pakistan.  
15

#### 16 17 18 **Strengths & Limitations of the study**

19  
20 [A study, first of its kind, which has expounded on the subject of TBAs role and livelihood after the](#)  
21 [introduction of trained MNCH providers in Pakistan.](#) Use of qualitative methods provided rich insight into  
22 women's interpretations and decision-making regarding health care seeking during and after pregnancy in  
23 a relatively conservative setting of Pakistan. [Study presents views of all stakeholders involved in the](#)  
24 [intervention.](#)  
25  
26  
27

28  
29 The findings represent a specific sample size, study site and socio-cultural milieu and therefore may not  
30 be generalized for the entire province or country. [Health providers involved in the study were mainly from](#)  
31 [AKHSP and government who were already exposed to this intervention. Only few TBAs could be](#)  
32 [gathered for discussion, because most of them were remotely located, and weather and family](#)  
33 [constraints did not allow them to travel. Moreover, the prospective role of TBA is discussed in a special](#)  
34 [context, whereby a CMW was trained and deployed in the area for increasing skilled birth attendance.](#)  
35  
36  
37  
38  
39  
40  
41  
42  
43  
44  
45  
46  
47  
48  
49  
50  
51  
52  
53  
54  
55  
56  
57  
58  
59  
60

1  
2  
3  
4  
5  
6  
7  
8  
9  
10  
11  
12  
13  
14  
15  
16  
17  
18  
19  
20  
21  
22  
23  
24  
25  
26  
27  
28  
29  
30  
31  
32  
33  
34  
35  
36  
37  
38  
39  
40  
41  
42  
43  
44  
45  
46  
47  
48  
49  
50  
51  
52  
53  
54  
55  
56  
57  
58  
59  
60

## Introduction

Despite all advances toward MDGs 4 & 5, every year 6.6 million children die before five years of age (44% as newborns) and 289,000 maternal deaths occur, mostly from preventable causes (1). This state of affairs has raised serious global concern over the years in developing countries to ensure availability and accessibility of human resources for ensuring continuum of care for expecting mothers. Uniform availability and distribution of skilled birth attendants is critical to consider while looking at health service utilization trends (2). The Millennium Declaration in 2000 signed by 189 nations, recognized proportion of births assisted by trained birth as an important indicator to track maternal and child survival indicators (3,4). To increase the availability and accessibility of maternal and child health care services, training of TBAs and strengthening the partnership between community midwives (CMWs) and TBAs is widely acknowledged worldwide (5,6). Nonetheless, role of the TBAs cannot be effective in a weak primary health care system and in an unplanned referral mechanism (7).

In order to attain MDG-5, isolated interventions are not able to reduce maternal mortality sufficiently. It is important to review strategies to maximize strengths of TBAs as well and skilled birth attendants. Evidence suggests that skilled birth attendance has increased in regions where TBAs are integrated with the formal health system (8). However, integration of TBAs with the formal health system may require capacity development and supervision of TBAs, collaboration skills for health workers, involvement of TBAs at health facilities and, improved capacity on communication and referral systems. With this approach, TBAs may positively contribute to maternal and child health outcomes (9). Trainings of the TBAs not only enhance their knowledge and skills on obstetric care and referral mechanism, but also lead to greater community acceptance and a greater consumer satisfaction. They can play a vital role in birth preparedness and identification of danger signs (10). Training of TBAs has shown impact on perinatal and neonatal deaths which can be significantly reduced (11). Moreover, TBAs have been a critical contributor in providing skilled [maternal, newborn and child health \(MNCH\)](#) care in rural population of developing countries due to inadequate numbers of human resource for service delivery (12). Therefore, role of trained TBAs in healthcare provision cannot be undermined. Developing countries have used TBAs as a key strategy to improve maternal and child health care (13). They have been effective in

1  
2  
3  
4  
5  
6  
7  
8  
9 improving referral mechanism and links with the formal health care system (14). Literature review has  
10 suggested that a TBA is preferred over a midwife who is young, unmarried girl and without children. This  
11 trend is more common in countries where fresh CMWs are recently deployed such as Pakistan (15,16).  
12 Another reason for the community acceptance of TBAs is that they are affordable option than professional  
13 midwives and she often accepts payment in kind (17). Moreover, TBAs are always happy to make house  
14 visits, warranting mother's privacy.  
15  
16  
17  
18

19  
20 Pakistan is among the few countries in South Asia that continues to have dismal maternal and child  
21 health indicators. In Pakistan, Maternal Mortality Ratios (MMR) is high, ranging from 240 to 700 per  
22 100,000 live births. The top three causes of maternal death are postpartum hemorrhage, eclampsia and  
23 sepsis. Approximately two-thirds of all births (61%) take place at home due to limited access to health  
24 facilities. Home based deliveries are usually attended by the TBA and now newly deployed community  
25 midwives in some rural parts of the country (18). While some maternity care indicators appear to have  
26 improved over the last two decades, women's access to prenatal health care continues to be low in  
27  
28  
29  
30  
31 Pakistan<sup>18</sup>.

32  
33  
34 Realizing the need for community health work force, Government of Pakistan launched the national  
35 MNCH program in 2006 to help the rural women deliver safely (19). Although the program has been  
36 successful in countries such as Malaysia and Indonesia, challenges faced by the CMW program of  
37 Pakistan are multifaceted. These challenges are related to acceptance by community, competition with  
38 other service providers, weak referral system, inadequate skill set and lack of community involvement  
39  
40  
41  
42 (20).  
43  
44

#### 45 **The intervention**

46 To address health system constraints, Chitral Child Survival Program (CCSP) of Aga Khan Foundation  
47 Pakistan (AKF-P) deployed CMWs, supported community financing scheme, improved referral linkages  
48 and implemented a behavior change communication campaign from 2008-2014. CCSP was implemented  
49  
50  
51 in close partnership of Department of Health, Khyber Pakhtunkhwa, Aga Khan Health Services (AKHSP);  
52

1  
2  
3  
4  
5  
6  
7  
8  
9  
10  
11  
12  
13  
14  
15  
16  
17  
18  
19  
20  
21  
22  
23  
24  
25  
26  
27  
28  
29  
30  
31  
32  
33  
34  
35  
36  
37  
38  
39  
40  
41  
42  
43  
44  
45  
46  
47  
48  
49  
50  
51  
52  
53  
54  
55  
56  
57  
58  
59  
60

Pakistan ([AKHSP](#)), and Aga Khan Rural Support Program (AKRSP). The CCSP interventions, especially the role of community based saving groups, village health committees (VHCs) and community based emergency maternal referral mechanism to achieve project results showed that CCSP had attempted to engage the TBAs proactively. The project empowered TBAs on Birth Preparedness and Complications Readiness (BPCR) plans and integrated referral mechanisms. Involvement of TBAs in the project was meaningful to generate the community acceptability for young CMWs, identification of high risk cases, and referrals of complications to CMW and transporting pregnant woman to health facility in time.

This research endeavored to identify the role of TBAs in supporting the MNCH care, partnership mechanism with the formal health system and also explored livelihood options for TBAs.

## Methodology

### *a) Study site*

The study was conducted in Chitral district, north western border of Pakistan, from March-April 2014. The population of the intervention area is 200,000, about 57% of the total population of the district and residing in 243 villages. The government department of health and Aga Khan Health Services Pakistan (AKHSP) are the two primary formal sector healthcare providers in Chitral. The public-sector healthcare infrastructure in the district includes 22 civil dispensaries, 21 basic health units; three tehsil headquarters and one district headquarter hospital (21). AKHSP operates its own 32 health facilities in Chitral which include 17 health centers, eight family health centers, four dispensaries and three secondary care facilities, covering 60% of Chitral district. The MMR in the province is 275/100,000 live births; whereas under five mortality is 75/1000 live births ([1849](#)). Despite the presence of skilled birth attendants under MNCH program, large proportion of the deliveries is still attended by TBAs in Chitral district.

### *b) Study Design and data collection*

The project documents and other relevant studies were thoroughly reviewed and the collated information guided to design the qualitative data collection instruments. A qualitative exploratory

study entailed seven KIIs and four FGDs conducted with different study participants. The questions for focus group discussion (FGD) and key informants interview (KIIs) explore the Field guides included open ended questions, covering topics such as role of TBAs in supporting MNCH care and CCSP project activities, community experience with TBAs, TBAs' relationship and coordination with the CMWs, referral of cases; remuneration and livelihood sources of TBAs; ways to engage TBAs in continuum of care, working relationships and linkages with the formal health system, and sustainability/livelihood of TBAs. Using a participation diagram in FGDs, it was ensured that all the participants must speak on each question. To ensure quality control, information collected through note-taking was cross-checked for completeness and consistency before and during data processing by the research team.

### c) Study participants

All the study participants were purposively sampled from the intervention areas in the district, with the help of the implementing agencies on ground. Community based health workers i.e. CMWs and TBAs; members of VHC and Community Based Saving Group (CBSG) were included in the discussion. The participants were encouraged by the moderator (PI) to interact with each other and comment on experiences and perceptions regarding role of TBAs, partnership with formal health system, and livelihood of TBAs. KIIs were conducted with two government health managers, two AKF-P managers, and three AKHSP managers. All the FGDs were conducted in the community; whereas KIIs were conducted in the respective offices of health managers. Table-1 presents the detail of the methods employed for the study.

**Table-1: Detail of methods employed in qualitative study**

| Cadre | Method | Total number of respondents | Area/Village                                                                                                                                                         |
|-------|--------|-----------------------------|----------------------------------------------------------------------------------------------------------------------------------------------------------------------|
| CMWs  | FGD    | 10                          | Mori Lshat, Barini, Awi, Miragarm, Sore Laspoor, Raman, Terich Payeen, Lot Owir Bala, Lot Owir Payeen, Gohkir, Parsan, Owir Lasht Arkari, Besti Arkari, Khuz, Phashk |
| TBAs  | FGD    | 5                           | Lower Porth, Brock Kalaway, Porth Bala, Raman, Brock Baraman Deh                                                                                                     |
| VHC   | FGD    | 8                           | Morder                                                                                                                                                               |

|                                                         |        |    |              |
|---------------------------------------------------------|--------|----|--------------|
| CBSG                                                    | FGD    | 10 | Morder       |
| Health managers<br>(AKHSP, AKF-P<br>&<br>DHDGovernment) | 7 KIIs | 07 | Chitral city |

Purposive sampling technique was adopted, inviting the participation of those CMWs, and TBAs who had been serving actively in their local communities for the last two years. These health workers were identified with the help of health managers of AKHSP and government. Likewise, only those members of VHC were invited for FGD, who had been active for the last two years. Each participant of the FGD and KII was given the verbal information about the study by the research team and was given a consent form prior to participation.

#### **d) Data analysis**

A qualitative content analysis was applied to analyze the information manually from all the FGDs and KIIs. A stepwise approach was adopted for the content analysis. The analysis aimed at finding manifest and latent meaning of data. The transcribed data was initially read several times by the principal researcher in order to find the sense of the whole. At first stage the segmentation of information was done i.e. segments and sub-segments of information were organized. Subsequently the significant information was extracted which was related to research questions. At second stage the common views of the respondents were put together at one place. At third stage, data was coded (different responses highlighted) and then these codes were grouped into categories and abstracted into sub-themes and a main theme. At final stage, the meanings of themes/descriptions were interpreted by keeping in view and considering the cultural context of the participants.

#### **Results**

The main theme which came out was the “emerging role of TBAs to improve Maternal, Newborn and Child Health”. After content analysis, following sub-themes were identified [as shown in Table 2:](#)

1. Community experience with CMWs and TBAs
2. View of participants on utilization of TBAs in formal health system



- 3. Role of TBAs in supporting obstetric care
- 4. Linkages and coordination among TBAs and CMWs
- 5. Livelihood of TBAs

**Table-2: Matrix of qualitative research analysis**

| Nodes                                         | Sub-nodes                                                                                                                                                                                                                                                                                                                                            |
|-----------------------------------------------|------------------------------------------------------------------------------------------------------------------------------------------------------------------------------------------------------------------------------------------------------------------------------------------------------------------------------------------------------|
| Community experience with CMWs and TBAs       | <ul style="list-style-type: none"> <li>- Availability of CMWs have empowered women for health care seeking</li> <li>- Community has trust and faith in TBAs and their services</li> </ul>                                                                                                                                                            |
| Linkage of TBAs with formal health system     | <ul style="list-style-type: none"> <li>-TBAs have pivotal role in health promotion activities such as health messages on breast feeding, mother and child immunization.</li> <li>-TBAs must assist CMW who is naïve to reproductive health matters.</li> <li>-TBAs can be involved in linking high risk cases to CMW and health facility.</li> </ul> |
| Role of TBAs in supporting obstetric care     | <ul style="list-style-type: none"> <li>- TBAs <del>promote health messages for expecting mothers</del>, assist CMW in delivery, identify expectant mothers with high risks, refer such cases to formal health system, and support post-natal care</li> </ul>                                                                                         |
| Linkages and coordination among TBAs and CMWs | <ul style="list-style-type: none"> <li>- Mixed responses in terms of relationship between CMWs and TBAs</li> <li>- VHC is an active forum for coordination</li> <li>- Coordination is better at places where TBA gets some share of CMW income</li> </ul>                                                                                            |
| Livelihood of TBAs                            | <ul style="list-style-type: none"> <li>- CMWs could offer some incentives to TBAs to strengthen referrals and assistance in skilled delivery</li> <li>- VHCs decide TBA incentive share of CMW income</li> <li>- Community pay in kind contribution to recognize services of TBA</li> </ul>                                                          |

Formatted: Left, Space After: 10 pt, Line spacing: Multiple 1.15 li, Adjust space between Latin and Asian text, Adjust space between Asian text and numbers

**Community experience with CMWs and TBAs**

Availability of CMWs and the supportive role of TBAs in obstetric care ~~has~~ benefited communities, by and large. Most of the respondents shared that availability of CMWs has empowered women in order to seek essential and emergency obstetric care in rural communities. Members of VHC appreciated the binding relation of CMWs with TBAs. Despite availability of CMWs, the community members still have greater trust and faith in TBAs who live and deals with the village women since ages. Some of the respondents told that they avail services of TBAs due to her rich experience as compared to CMWs who are young and yet naïve to various reproductive health matters.

1  
2  
3  
4  
5  
6  
7  
8  
9  
10  
11  
12  
13  
14  
15  
16  
17  
18  
19  
20  
21  
22  
23  
24  
25  
26  
27  
28  
29  
30  
31  
32  
33  
34  
35  
36  
37  
38  
39  
40  
41  
42  
43  
44  
45  
46  
47  
48  
49  
50  
51  
52  
53  
54  
55  
56  
57  
58  
59  
60

*"TBA still has the critical role as being more in proximity to the village women. She enjoys far more trust of the communities. She has a years' long rapport with the families. People tend to follow her advice."*  
(Director Health, AKF-P)

*"I consider the role of TBAs important for two reasons; firstly they have been trusted by the communities, so they need to be taken on board for enhancing referrals to CMWs. Secondly, if they are not engaged properly then they will do more harm by doing deliveries and might spread negative propaganda too about the CMWs".* (KII-AKF-P Senior Program Officer)

*"I take my wife and child to CMW to see for medical help or treatment for maternal and child health problems? In our village, Dai (TBA) enjoys good relationship with the CMW".* (FGD-VHC, Morder)"

*"My family often seeks services from a TBA...she has all the experience."* (FGD-VHC, Morder)

*"The TBAs are working since long time and they have developed trust in the communities".* (KII, AKHSP Manager)

#### **Linkage of TBAs with formal health system**

TBAs have pivotal role in health promotion activities such as health messages on nutrition, breast feeding, and vaccination promotion. Viewpoints of participants revealed that TBAs can be mainstreamed in a formal health system by assigning health promotion activities and for referring high risk cases to CMW and health facility.

*"The TBAs have role in referring of high risk cases and expectant mothers for delivery to CMWs. TBAs are also playing very good role in the community in identifying pregnant mothers during 1<sup>st</sup> trimester in the community, arranging TT vaccinations and providing education on nutrition during pregnancy."* (GM, AKHSP)

1  
2  
3  
4  
5  
6  
7  
8  
9  
10  
11  
12  
13  
14  
15  
16  
17  
18  
19  
20  
21  
22  
23  
24  
25  
26  
27  
28  
29  
30  
31  
32  
33  
34  
35  
36  
37  
38  
39  
40  
41  
42  
43  
44  
45  
46  
47  
48  
49  
50  
51  
52  
53  
54  
55  
56  
57  
58  
59  
60

*"They (TBAs) must be linked with the formal health system especially for health promotion, referrals and assisting deliveries with CMWs, when needed" (FGD-VHC, Morder)*

### **Role of TBAs in supporting obstetric care**

TBAs have pivotal role in terms of identifying pregnancy related complications and assisting safe obstetric care services with CMWs. Traditionally, TBAs have been involved in the promotion of better nutrition practices for pregnant mothers, breastfeeding practices, TT vaccination of expectant mothers, prevention of neonatal hypothermia, and post-natal care including family planning. TBAs have a crucial role in strengthening referral and coordination mechanisms with CMWs and with the health facility. Findings of the KIIs and FGDs revealed that some TBAs were even involved in assisting deliveries with CMWs.

*"Many TBAs, no doubt have a sound folk wisdom, which can be used for various health promotion messages, especially where there is no other community health worker. Moreover, TBAs can be trained in providing antenatal care, TT vaccine, Misoprostol administration, recognizing the danger signs of pregnancy etc. This will give her a feeling that she still has a role to play in saving women's lives."*  
*(Director Health, AKF-P)*

*"TBAs promote breastfeeding and healthy nutritional practices in our community for mother and children; and they can keep on doing that". (FGD-VHC, Morder)*

*"In my village, TBA assists delivery with me and refers cases to me. I have to say that she is of great help for me". (FGD-CMWs, Parsan)*

*"They (TBAs) said, they do refer cases to them and in many cases have joined CMWs for conducting deliveries." (KII-AKF-P Senior Program Officer)*

### **Linkages and coordination mechanisms among TBAs and CMWs**

1  
2  
3  
4  
5  
6  
7  
8  
9  
10  
11  
12  
13  
14  
15  
16  
17  
18  
19  
20  
21  
22  
23  
24  
25  
26  
27  
28  
29  
30  
31  
32  
33  
34  
35  
36  
37  
38  
39  
40  
41  
42  
43  
44  
45  
46  
47  
48  
49  
50  
51  
52  
53  
54  
55  
56  
57  
58  
59  
60

~~Mixed responses were recorded with regards to linkages and coordination among TBAs and CMWs.~~

~~There is no formal referral mechanism between TBAs and the CMWs.~~ Lack of role clarity, physical inaccessibility, professional rivalry and few income opportunities are key factors for weak linkages between TBAs and CMWs. Some of the CMWs expressed that they encountered problems and resistance from the TBAs and community during the initial phase of deployment. Village health committee shared that they invite both TBAs and CMWs in the VHC meetings. Performance of TBAs vis-à-vis skills related to maternal and newborn health is not satisfactory. Therefore, they now go to the CMWs who have adequate competency in knowledge and skills about the obstetric care. Some of the members shared that TBAs refer complicated expectant mothers to CMWs and health facility. In few instances, TBA was seen to be assisting the CMW in deliveries.

*“Rivalry; both are birth attendants; one is practicing by virtue of folk knowledge and the other is trained according to modern guidelines and WHO standards. So that has created a competition. At places, there is coordination too, where both are from the same family or where both have realized each other’s importance.” (Director Health, AKF-P)*

*“The issues between TBA and CMW can be effectively dealt if AKHSP works with all stakeholders and set out a proper coordination plan, and play catalytic role to nurture a health relationship.” (KII-AKF-P, Senior Program Officer)*

*“In some areas of intervention, the TBA perceived CMW as competitor.” (GM, AKHSP)*

*“Introduction of CMWs in the areas will limit the role of TBAs. To cope with this challenge the TBAs were included in the VHCs and the roles/responsibilities of the CMWs were communicated through this platform”. (KII, AKRSP Manager)*

1  
2  
3  
4  
5  
6  
7  
8  
9  
10  
11  
12  
13  
14  
15  
16  
17  
18  
19  
20  
21  
22  
23  
24  
25  
26  
27  
28  
29  
30  
31  
32  
33  
34  
35  
36  
37  
38  
39  
40  
41  
42  
43  
44  
45  
46  
47  
48  
49  
50  
51  
52  
53  
54  
55  
56  
57  
58  
59  
60

*"Many TBAs are in favor of CMWs because they cannot handle the complicated cases properly; yet some are against her. VHC is trying to bring the TBA as member in VHC and told them about the importance of deliveries by skilled hand and hygienic way." (FGD-VHC, Morder)*

According to CMWs, they have high regard for the TBA, her experience and wisdom. They feel that TBA can complement their work. On the other hand, most TBAs are satisfied with CMWs work, skills and services rendered to the community women. Very few seem to be unhappy indeed.

### **Livelihood and sustainability of TBAs**

Supporting role of TBAs is very important; especially in context of difficult geographical terrains in Chitral. Various options as well as mechanisms were identified by the respondents, when asked about livelihood prospects of TBAs. Most of the respondents were of opinion that CMWs must pay some incentives to TBAs to strengthen referrals and assistance in skilled delivery. Findings of the KII revealed that one of the available forums to decide TBAs incentives is village committee. VHCs and other available forums such as Local Support organizations (LSOs) can play pivotal role in taking up such decisive role for supporting livelihood options for TBAs. Regarding payment to TBAs, some of the CMWs did not recompense TBAs. Some of the TBAs also told that they get in kind contributions and support for her services from the village families and not from the CMWs.

*"It is an informal arrangement between the two of them. Officially there is no binding on the CMW to pay TBA for referrals." (Director Health, AKF-P)*

*"One of the CMW referred two cases to CMWs, and in fact she did join her for conducting the deliveries, but in return did not get anything from the CMW and the family too." (KII-AKF-P, Senior Program Officer)*

*"Let it be the VHC meeting to decide about some incentives to be given to TBAs from CMW fee, because she will be referring every case to CMW. CMW should provide some money to TBA". (KII, AKHSP Manager)*

1  
2  
3  
4  
5  
6  
7  
8  
9 *"TBAs were providing delivery services before CMWs' deployment; hence CMWs' services will certainly affect*  
10 *their regular income (in cash or in kind). CMW should give incentive from her service fee to TBAs on each*  
11 *referral; whereas TBA can continue providing care to mother after delivery". (KII, Manager Programs, AKHSP)*  
12

13  
14  
15 *"In our area, CMW is paying Rs200 to the TBA for each referral". (FGD-VHC, Morder)*  
16

17  
18 *"In two cases, I assisted CMW for delivery of a mother. CMW did not give me any money. I got some*  
19 *cash and chicken from the house of delivered mother". (FGD-TBA, Lower Porth)*  
20  
21

## 22 Discussion

23  
24 Though communities where CMWs are deployed after training are happy, yet t  
25 he continued utilization of  
26 TBAs' services in Chitral. Fact -is attributed to several factors including the TBAs' proximity to several  
27 villages, TBAs' respectful attitude toward the community, and flexible modes of payment (22,23). CMWs  
28 have been recently deployed in Chitral and experienced challenges and constraints by community based  
29 health providers and community itself in delivery of maternal health services (24,25). Evidence suggests  
30 that health management committees at the village level have been effective in reducing maternal  
31 complications through promoting linkages of health care providers with the community (26). The findings  
32 of our study also revealed that community forum in the form of VHC has played pivotal role in convincing  
33 the communities to avail CMW services and motivate the TBA to continue in supportive role in MNCH  
34 care. ~~linking TBAs and CMWs with the community members.~~ Awareness sessions have to be conducted  
35 on regular basis and on different forums to better inform the elder women and expecting mothers about  
36 the benefits of making use of skilled birth attendant i.e. CMW.  
37  
38  
39  
40  
41  
42  
43  
44

45 Results of our study found that TBAs play vital role in improving maternal health such as diagnosing  
46 labor, assisting clean delivery with CMWs, detecting and referring maternal complications, and promoting  
47 health messages. While trained TBAs are not considered skilled birth attendants, their potential  
48 contribution in supporting maternal care has been recognized in low income and middle countries facing  
49 issues of human response scarcity (12, [Error! Bookmark not defined.](#)<sup>13</sup>). Role of TBAs in administration  
50  
51  
52

1  
2  
3  
4  
5  
6  
7  
8  
9 of misoprostol to prevent postpartum hemorrhage in home-births is oft-advocated (27,28). Nevertheless,  
10 the role of TBAs in supporting MNCH care cannot be neglected in settings where skilled birth attendants  
11 are fewer and new to health system. In the wake of reforms and the novel MNCH program of Pakistan,  
12 role of TBAs in improving maternal care and transforming health seeking behaviours ought to be  
13 promoted (29). Defining her role and contribution in the continuum of care is linked to her livelihood and  
14 income generation.  
15  
16  
17  
18

19  
20 Improved linkages and relationship among CMWs and TBAs is of essence to flourish referral system from  
21 community to health facility. Better coordination and collaboration of TBAs with CMWs was promoted  
22 under CCSP, by sensitizing the CMW on prospective role of TBA which will complement her services and  
23 will help in building her rapport with the community. TBA, who has a long standing link with local  
24 community, can act as a bridge to strengthen referral mechanism between community and the formal  
25 health system (1524). Findings of the qualitative study follow other studies which demonstrated that a  
26 formal partnership program among TBAs and the skilled midwives has yet to be seen (56). While the  
27 importance of the TBAs role in referral is universally acknowledged, most health systems have not  
28 developed an effective referral mechanism. The CCSP project provided an enabling forum at the village  
29 level for CMWs and TBAs to interact and improve referral linkages. Such partnership is crucial to improve  
30 access to health care services, especially for communities living in the remote areas. Nevertheless,  
31 training and monitoring TBAs on MNCH care is imperative to minimize chances of malpractices (13).  
32  
33  
34  
35  
36  
37  
38  
39 Therefore, joint monitoring by AKHSP and government, by involving the village health committees could  
40 be instrumental in this regard. Moreover, participatory monitoring is always less threatening; and hence  
41 TBAs should be meaningfully engaged in such type of monitoring.  
42  
43  
44

45 Financial constraints are a major risk to the livelihood of TBAs as evident from the findings of our study.  
46 Mostly they are receiving in kind payments by the family of expectant mothers; and a nominal payment by  
47 CMWs for each referral. CMWs must keep a cushion of nominal payment to TBA, after verifying her  
48 services. That will surely help in building a healthy relationship amongst the two service providers. Where  
49 TBAs did not receive any share from the CMWs, we found weak coordination mechanisms with the formal  
50  
51  
52

1  
2  
3  
4  
5  
6  
7  
8  
9  
10  
11  
12  
13  
14  
15  
16  
17  
18  
19  
20  
21  
22  
23  
24  
25  
26  
27  
28  
29  
30  
31  
32  
33  
34  
35  
36  
37  
38  
39  
40  
41  
42  
43  
44  
45  
46  
47  
48  
49  
50  
51  
52  
53  
54  
55  
56  
57  
58  
59  
60

health system. Evidence suggests that in kind contributions by clients are the most common mode of payment by the clients (89,1044). With the increasing use of TBAs in MNCH care, the question of compensation has become more pressing because these workers usually rely on rewards and in kind contributions by the clients (30). Continuing efforts to define the role of TBAs may benefit from an emphasis on their potential as active promoters of essential newborn care (31). In the context of Pakistan, the role of TBAs ought to be revisited and redefined, not only for the sake of trust of communities on her services, but also for her own livelihood.

### **Conclusion**

Prevailing poverty in the area calls for thinking solutions to ensure livelihood of TBAs, and to figure out an emerging role for her after the introduction of CMW in the health system. TBAs surely have solutions in the continuum of care for pregnant women, lactating mothers and children under five. They continue to take pride and see value in their role in the health system to support MNCH care. Health systems performance can be amplified by having a healthy interface between the TBAs and CMWs, and for the larger benefit of the communities served.

### **Acknowledgement:**

The authors acknowledge the facilitation and assistance provided by AKF-P, AKHSP and AKRSP to carry out field data collection.

### **Ethical consideration:**

Ethics approval for this study was granted by the Institutional Review Board of Aga Khan Health Services, Pakistan. Verbal informed consent was obtained from all the study participants, after explaining the objectives of the study. Confidentiality and anonymity was assured to all the participants. Data was kept under lock and key with the principal researcher.

### **Authors' contributions**



1  
2  
3  
4  
5  
6  
7  
8  
9 BTS and SAK conceived the study design and instruments. AM supervised the data collection and helped  
10 in analyses. BTS and SAK drafted the successive drafts of paper. SA conducted the critical review and  
11 added the intellectual content to the paper. All authors read and approved the final draft.  
12

13  
14  
15 **Funding:** The study was a part of larger project "Chitral Child Survival Program" funded by USAID.  
16

#### 17 **Competing Interests**

18 The authors declare that they have no competing interests.  
19

#### 20 **References**

- 
- 21  
22  
23  
24  
25  
26 1. World Health Organization & UNICEF. Countdown to 2015 and beyond: fulfilling the health  
27 agenda for women and children. Geneva: 2014.  
28  
29 2. Shaikh BT. Marching toward the Millennium Development Goals: What about health systems,  
30 health-seeking behaviours and health service utilization in Pakistan? *World Health & Popul* 2008;  
31 10(2): 44-52.  
32  
33 3. United Nations. Road map towards the implementation of the United Nations Millennium  
34 Declaration: report of the Secretary-General. New York: 2001.  
35  
36 4. Sachs JD, McArthur JW. The Millennium Project: a plan for meeting the Millennium Development  
37 Goals. *Lancet* 2005; 365(9456):347-53.  
38  
39 5. Titaley CR, Hunter CL, Dibley MJ, Heywood P. Why do some women still prefer traditional birth  
40 attendants and home delivery? A qualitative study on delivery care services in West Java  
41 Province, Indonesia. *BMC Pregnancy Childbirth* 2010; 10:43.  
42  
43 6. Lassi ZS, Haider BA, Bhutta ZA. Community-based intervention packages for reducing maternal  
44 and neonatal morbidity and mortality and improving neonatal outcomes. *Cochrane Database Syst*  
45 *Rev* 2010; 11: CD007754.  
46  
47 7. Garces A, McClure EM, Chomba E, Patel A, Pasha O, Tshetu A. Home birth attendants in low  
48 income countries: who are they and what do they do? *BMC Pregnancy Childbirth* 2012; 12:34.  
49  
50  
51  
52  
53  
54  
55  
56  
57  
58  
59  
60

8. Byrne A, Morgan A. How the integration of traditional birth attendants with formal health systems can increase skilled birth attendance. *Int J Gynaecol Obstet* 2011; 115(2):127-34.
9. Ray AM, Salihu HM. The impact of maternal mortality interventions using traditional birth attendants and village midwives. *J Obstet Gynaecol* 2004; 24(1):5-11.
10. Agarwal S, Sethi V, Srivastava K, Jha PK, Baqui AH. Birth preparedness and complication readiness among slum women in Indore City, India. *J Health Nutr Popul* 2010; 28(4): 383-391.
11. Wilson A, Gallos ID, Plana N, Lissauer D, Khan KS, Zamora J, et al. Effectiveness of strategies incorporating training and support of traditional birth attendants on perinatal and maternal mortality: meta-analysis. *BMJ* 2011; 343:d7102.
12. Sibley LM, Sipe TA. Transition to skilled birth attendance: Is there a future role for trained traditional birth attendants. *J Health Popul Nutr* 2006; 24(4):472-8.
13. Bisika T. The effectiveness of the TBA programme in reducing maternal mortality and morbidity in Malawi. *East Afr J Public Health* 2008; 5(2):103–10.
14. Chalo RN, Salihu HM, Nabukera S, Zirabamuzaale C. Referral of high-risk pregnant mothers by trained traditional birth attendants in Buikwe County, Mukono District, Uganda. *J Obstet Gynaecol* 2005; 25(6):554-7.
15. Temesgen TM, Umer JY, Buda DS, Haregu TN. Contribution of traditional birth attendants to the formal health system in Ethiopia: the case of Afar region. *Pan Afr Med J* 2012; 13(Suppl 1):15.
16. Wajid A, Rashid Z, Mir AM. Initial assessment of Community Midwives in rural Pakistan. PAIMAN. JSI Research and Training Institute, Inc; Islamabad: 2010.
17. Concern Worldwide. Examining the role of traditional birth attendants in the continuum of care in Sierra Leone. Innovations for maternal, newborn and child health. Policy Brief. Concern Worldwide; New York: 2013.
18. National Institute of Population Studies and Macro International Inc. Pakistan Demographic and Health Survey (PDHS) 2006–07. Government of Pakistan; Islamabad: 2008.
19. Government of Pakistan. PC1 National Maternal Newborn & Child health Program 2006-2012. Ministry of Health, Government of Pakistan; Islamabad: 2009.

- 
- 1  
2  
3  
4  
5  
6  
7  
8  
9  
10  
11  
12  
13  
14  
15  
16  
17  
18  
19  
20  
21  
22  
23  
24  
25  
26  
27  
28  
29  
30  
31  
32  
33  
34  
35  
36  
37  
38  
39  
40  
41  
42  
43  
44  
45  
46  
47  
48  
49  
50  
51  
52  
53  
54  
55  
56  
57  
58  
59  
60
20. Research and Development Solutions. The community midwives program in Pakistan. Policy Brief Series No 20. Islamabad: 2012.
  21. Department of Health. District health profile-Chitral. Government of Khyber Pakhtunkhwa; Peshawar: 2014.
  22. Chesney M, Davies S. Women's birth experiences in Pakistan – the importance of the Dai. The Royal College of Midwives. *Evid Based Midwifery* 2005; 3(1):26-32.
  23. Owolabi OO, Glenton C, Lewin S, Pakenham-Walsh N. Stakeholder views on the incorporation of traditional birth attendants into the formal health systems of low-and middle-income countries: a qualitative analysis of the HIFA2015 and CHILD2015 email discussion forums. *BMC Pregnancy Childbirth* 2014; 14:118.
  24. Sarfraz M, Hamid S. Challenges in delivery of skilled maternal care-Experiences of community midwives in Pakistan. *BMC Pregnancy Childbirth* 2014; 14:59.
  25. Research and Advocacy Fund/Children First. How far can I go? Social mobility of CMWs in Azad Kashmir. Islamabad: 2012.
  26. Morrison J, Tumbahangphe KM, Budhathoki B, Neupane R, Sen A, Dahal K, et al. Community mobilization and health management committee strengthening to increase birth attendance by trained health workers in rural Makwanpur, Nepal: study protocol for a cluster randomized controlled trial. *Trials* 2011; 12:128.
  27. Walraven G, Blum J, Dampha Y, Sowe M, Morison L, Winikoff B, et al. Misoprostol in the management of the third stage of labour in the home delivery setting in rural Gambia: a randomized controlled trial. *Br J Obstet Gynaecol* 2005; 112: 1277-83.
  28. Mobeen N, Durocher J, Zuberi N, Jahan N, Blum J, Wasim S, et al. Administration of misoprostol by trained traditional birth attendants to prevent postpartum hemorrhage in homebirths in Pakistan: a randomized placebo-controlled trial. *BJOG* 2011; 118(3):353-61.
  29. Shaikh BT, Haran D, Hatcher J. Women's social position and health-seeking behaviors: Is the health care system accessible and responsive in Pakistan? *Health Care Women Int* 2008; 29:945-959.

- 
- 1  
2  
3  
4  
5  
6  
7  
8  
9  
10 30. Gill CJ, Phiri-Mazala G, Guerina NG, Kasimba J, Mulenga C, MacLeod WB. Effect of training  
11 traditional birth attendants on neonatal mortality (Lufwanyama Neonatal Survival Project):  
12 randomized controlled study. *BMJ* 2011; 342:d346.  
13  
14 31. Falle TY, Mulany LC, Thatte N, Khattry SK, LeClerg SC, Darmstadt GL, et al. Potential role of  
15 traditional birth attendants in neonatal healthcare in rural southern Nepal. *J Health Popul Nutr*  
16 2009; 27(1): 53–61.  
17  
18  
19  
20  
21  
22  
23  
24  
25  
26  
27  
28  
29  
30  
31  
32  
33  
34  
35  
36  
37  
38  
39  
40  
41  
42  
43  
44  
45  
46  
47  
48  
49  
50  
51  
52  
53  
54  
55  
56  
57  
58  
59  
60

# BMJ Open

## Emerging role of traditional birth attendants in mountainous terrain: A qualitative exploratory study from Chitral District, Pakistan

|                                 |                                                                                                                                                                                                                                                                          |
|---------------------------------|--------------------------------------------------------------------------------------------------------------------------------------------------------------------------------------------------------------------------------------------------------------------------|
| Journal:                        | <i>BMJ Open</i>                                                                                                                                                                                                                                                          |
| Manuscript ID:                  | bmjopen-2014-006238.R2                                                                                                                                                                                                                                                   |
| Article Type:                   | Research                                                                                                                                                                                                                                                                 |
| Date Submitted by the Author:   | 20-Oct-2014                                                                                                                                                                                                                                                              |
| Complete List of Authors:       | Shaikh, Babar; Aga Khan Foundation, Pakistan, Health & Built Environment Khan, Sharifullah; Aga Khan Foundation, Health & Built Environment Maab, Ayesha; Aga Khan Foundation, Health & Built Environment Amjad, Sohail; Aga Khan Foundation, Health & Built Environment |
| <b>Primary Subject Heading</b>: | Health services research                                                                                                                                                                                                                                                 |
| Secondary Subject Heading:      | Health policy, Obstetrics and gynaecology, Public health, Qualitative research, Reproductive medicine                                                                                                                                                                    |
| Keywords:                       | Health policy < HEALTH SERVICES ADMINISTRATION & MANAGEMENT, Organisation of health services < HEALTH SERVICES ADMINISTRATION & MANAGEMENT, Public health < INFECTIOUS DISEASES                                                                                          |
|                                 |                                                                                                                                                                                                                                                                          |

SCHOLARONE™  
Manuscripts

1  
2  
3 **Emerging role of traditional birth attendants in mountainous terrain: A qualitative exploratory**  
4 **study from Chitral District, Pakistan**  
5  
6  
7

8  
9 Babar Tasneem Shaikh, MPH, PhD, FRCP Edin

10  
11 Sharifullah Khan, MPH

12  
13 Ayesha Maab, MSc

14  
15 Sohail Amjad, MA-HM, MA-HMPP  
16  
17  
18  
19  
20

21 **Running title:** Role of traditional birth attendants  
22  
23  
24  
25  
26

27 **Corresponding author**

28  
29 **Dr Babar Tasneem Shaikh**

30  
31 Aga Khan Foundation (Pakistan)

32  
33 Level Nine, Serena Business Complex

34  
35 Khayaban-e-Suharwardy, Islamabad

36  
37 t: +92 51 111-253-254

38  
39 f: +92 51 2072552

40  
41 e: [shaikh.babar@gmail.com](mailto:shaikh.babar@gmail.com)  
42  
43  
44  
45  
46  
47  
48  
49  
50  
51  
52  
53  
54  
55  
56  
57  
58  
59  
60

1  
2  
3 **Abstract:**  
4

5 **Objectives:** This research endeavors to to identify the role of TBAs in supporting the MNCH care,  
6  
7 partnership mechanism with the formal health system and also explored livelihood options for TBAs in the  
8  
9 health system of Pakistan.  
10

11  
12  
13 **Setting:** The study was conducted in District Chitral, Khyber Pakhtunkhwa province, covering the areas  
14  
15 where Chitral Child Survival programme was implemented.  
16

17  
18  
19 **Participants:** A qualitative exploratory study was conducted, comprising seven Key informant interviews  
20  
21 (KIIs) with health managers, and four focus group discussions (FGDs) with CMWs, TBAs, members of  
22  
23 CBSG and members of Village Health Committees (VHCs).  
24

25  
26  
27 **Results:** The study identified that In the new scenario, after the introduction of CMW in the health  
28  
29 system, TBAs still have a pivotal role in health promotion activities such as breast feeding promotion and  
30  
31 vaccination. TBAs can assist CMWs in normal deliveries, and refer high risk cases to formal health  
32  
33 system. Generally, TBAs are positive about CMWs' introduction and welcome this addition. Yet, their  
34  
35 livelihood has suffered after CMWs deployment. Monetary incentives to them in recognition of referrals to  
36  
37 CMWs could be one solution. VHC is an active forum for strengthening coordination between the two  
38  
39 service providers and to ensure an alternate and permanent livelihood support system for the TBAs.  
40

41  
42  
43 **Conclusion:** TBAs assured their continued support in provision of continuum of care for pregnant  
44  
45 women, lactating mothers and children under five. The district health authorities must figure out ways to  
46  
47 foster a healthy interface vis-à-vis roles and responsibilities of TBAs and CMWs. After some time, it would  
48  
49 be worthwhile to do further research to look into the CMW's integration in the system, as well as TBA's  
50  
51 continued role for provision of MNCH care.  
52

53  
54  
55 **Keywords:** Maternal Newborn & Child Health, Traditional birth attendant, Community midwife, Qualitative  
56  
57 research, Pakistan.  
58

### Strengths & Limitations of the study

A study, first of its kind, which has expounded on the subject of TBAs role and livelihood after the introduction of trained MNCH providers in Pakistan. Use of qualitative methods provided rich insight into women's interpretations and decision-making regarding health care seeking during and after pregnancy in a relatively conservative setting of Pakistan. Study presents views of all stakeholders involved in the intervention.

The findings represent a specific sample size, study site and socio-cultural milieu and therefore may not be generalized for the entire province or country. Health providers involved in the study were mainly from AKHSP and government who were already exposed to this intervention. Only few TBAs could be gathered for discussion, because most of them were remotely located, and weather and family constraints did not allow them to travel. Moreover, the prospective role of TBA is discussed in a special context, whereby a CMW was trained and deployed in the area for increasing skilled birth attendance.



## Introduction

Despite all advances toward MDGs 4 & 5, every year 6.6 million children die before five years of age (44% as newborns) and 289,000 maternal deaths occur, mostly from preventable causes (1). This state of affairs has raised serious global concern over the years in developing countries to ensure availability and accessibility of human resources for ensuring continuum of care for expecting mothers. Uniform availability and distribution of skilled birth attendants is critical to consider while looking at health service utilization trends (2). The Millennium Declaration in 2000 signed by 189 nations, recognized proportion of births assisted by trained birth as an important indicator to track maternal and child survival indicators (3,4). To increase the availability and accessibility of maternal and child health care services, training of TBAs and strengthening the partnership between community midwives (CMWs) and TBAs is widely acknowledged worldwide (5,6). Nonetheless, role of the TBAs cannot be effective in a weak primary health care system and in an unplanned referral mechanism (7).

In order to attain MDG-5, isolated interventions are not able to reduce maternal mortality sufficiently. It is important to review strategies to maximize strengths of TBAs as well and skilled birth attendants. Evidence suggests that skilled birth attendance has increased in regions where TBAs are integrated with the formal health system (8). However, integration of TBAs with the formal health system may require capacity development and supervision of TBAs, collaboration skills for health workers, involvement of TBAs at health facilities and, improved capacity on communication and referral systems. With this approach, TBAs may positively contribute to maternal and child health outcomes (9). Trainings of the TBAs not only enhance their knowledge and skills on obstetric care and referral mechanism, but also lead to greater community acceptance and a greater consumer satisfaction. They can play a vital role in birth preparedness and identification of danger signs (10). Training of TBAs has shown impact on perinatal and neonatal deaths which can be significantly reduced (11). Moreover, TBAs have been a critical contributor in providing skilled maternal, newborn and child health (MNCH) care in rural population of developing countries due to inadequate numbers of human resource for service delivery (12). Therefore, role of trained TBAs in healthcare provision cannot be undermined. Developing countries have used TBAs as a key strategy to improve maternal and child health care (13). They have been effective in

1  
2  
3 improving referral mechanism and links with the formal health care system (14). Literature review has  
4 suggested that a TBA is preferred over a midwife who is young, unmarried girl and without children. This  
5 trend is more common in countries where fresh CMWs are recently deployed such as Pakistan (15,16).  
6  
7 Another reason for the community acceptance of TBAs is that they are affordable option than professional  
8 midwives and she often accepts payment in kind (17). Moreover, TBAs are always happy to make house  
9 visits, warranting mother's privacy.  
10  
11  
12  
13  
14  
15  
16

17 Pakistan is among the few countries in South Asia that continues to have dismal maternal and child  
18 health indicators. In Pakistan, Maternal Mortality Ratios (MMR) is high, ranging from 240 to 700 per  
19 100,000 live births. The top three causes of maternal death are postpartum hemorrhage, eclampsia and  
20 sepsis. Approximately two-thirds of all births (61%) take place at home due to limited access to health  
21 facilities. Home based deliveries are usually attended by the TBA and now newly deployed community  
22 midwives in some rural parts of the country (18). While some maternity care indicators appear to have  
23 improved over the last two decades, women's access to prenatal health care continues to be low in  
24 Pakistan<sup>18</sup>.  
25  
26  
27  
28  
29  
30  
31  
32  
33  
34

35 Realizing the need for community health work force, Government of Pakistan launched the national  
36 MNCH program in 2006 to help the rural women deliver safely (19). Although the program has been  
37 successful in countries such as Malaysia and Indonesia, challenges faced by the CMW program of  
38 Pakistan are multifaceted. These challenges are related to acceptance by community, competition with  
39 other service providers, weak referral system, inadequate skill set and lack of community involvement  
40 (20).  
41  
42  
43  
44  
45  
46  
47  
48

### 49 **The intervention**

50 To address health system constraints, Chitral Child Survival Program (CCSP) of Aga Khan Foundation  
51 Pakistan (AKF-P) deployed CMWs, supported community financing scheme, improved referral linkages  
52 and implemented a behavior change communication campaign from 2008-2014. CCSP was implemented  
53 in close partnership of Department of Health, Khyber Pakhtunkhwa, Aga Khan Health Services Pakistan  
54  
55  
56  
57  
58  
59  
60

1  
2  
3 (AKHSP), and Aga Khan Rural Support Program (AKRSP). The CCSP interventions, especially the role of  
4 community based saving groups, village health committees (VHCs) and community based emergency  
5 maternal referral mechanism to achieve project results showed that CCSP had attempted to engage the  
6 TBAs proactively. The project empowered TBAs on Birth Preparedness and Complications Readiness  
7 (BPCR) plans and integrated referral mechanisms. Involvement of TBAs in the project was meaningful to  
8 generate the community acceptability for young CMWs, identification of high risk cases, and referrals of  
9 complications to CMW and transporting pregnant woman to health facility in time.  
10  
11  
12  
13  
14  
15  
16  
17  
18

19 This research endeavored to identify the role of TBAs in supporting the MNCH care, partnership  
20 mechanism with the formal health system and also explored livelihood options for TBAs.  
21  
22  
23  
24

## 25 **Methodology**

### 26 **a) Study site**

27  
28 The study was conducted in Chitral district, north western border of Pakistan, from March-April 2014.  
29 The population of the intervention area is 200,000, about 57% of the total population of the district  
30 and residing in 243 villages. The government department of health and Aga Khan Health Services  
31 Pakistan (AKHSP) are the two primary formal sector healthcare providers in Chitral. The public-sector  
32 healthcare infrastructure in the district includes 22 civil dispensaries, 21 basic health units; three tehsil  
33 headquarters and one district headquarter hospital (21). AKHSP operates its own 32 health facilities  
34 in Chitral which include 17 health centers, eight family health centers, four dispensaries and three  
35 secondary care facilities, covering 60% of Chitral district. The MMR in the province is 275/100,000  
36 live births; whereas under five mortality is 75/1000 live births (18). Despite the presence of skilled  
37 birth attendants under MNCH program, large proportion of the deliveries is still attended by TBAs in  
38 Chitral district.  
39  
40  
41  
42  
43  
44  
45  
46  
47  
48  
49

### 50 **b) Study Design and data collection**

51  
52 The project documents and other relevant studies were thoroughly reviewed and the collated  
53 information guided to design the qualitative data collection instruments. A qualitative exploratory  
54  
55  
56  
57  
58  
59  
60

study entailed seven KIIs and four FGDs conducted with different study participants. The questions for focus group discussion (FGD) and key informants interview (KIIs) explore the role of TBAs in supporting MNCH care and CCSP project activities, community experience with TBAs, TBAs' relationship and coordination with the CMWs, referral of cases; remuneration and livelihood sources of TBAs; ways to engage TBAs in continuum of care, working relationships and linkages with the formal health system, and sustainability/livelihood of TBAs. Using a participation diagram in FGDs, it was ensured that nobody is missed out and that all the participants must speak on each question. To ensure quality control, information collected through note-taking was cross-checked for completeness and consistency before and during data processing by the research team.

### c) *Study participants*

All the study participants were purposively sampled from the intervention areas in the district, with the help of the implementing agencies on ground. Community based health workers i.e. CMWs and TBAs; members of VHC and Community Based Saving Group (CBSG) were included in the discussion. The participants were encouraged by the moderator (PI) to interact with each other and comment on experiences and perceptions regarding role of TBAs, partnership with formal health system, and livelihood of TBAs. KIIs were conducted with two government health managers, two AKF-P managers, and three AKHSP managers. All the FGDs were conducted in the community; whereas KIIs were conducted in the respective offices of health managers. Table-1 presents the detail of the methods employed for the study.

**Table-1: Detail of methods employed in qualitative study**

| Cadre | Method | Total number of respondents | Village                                                                                                                                                              |
|-------|--------|-----------------------------|----------------------------------------------------------------------------------------------------------------------------------------------------------------------|
| CMWs  | FGD    | 10                          | Mori Lshat, Barini, Awi, Miragarm, Sore Laspoor, Raman, Terich Payeen, Lot Owir Bala, Lot Owir Payeen, Gohkir, Parsan, Owir Lasht Arkari, Besti Arkari, Khuz, Phashk |
| TBAs  | FGD    | 5                           | Lower Porth, Brock Kalaway, Porth Bala, Raman, Brock Baraman Deh                                                                                                     |
| VHC   | FGD    | 8                           | Morder                                                                                                                                                               |
| CBSG  | FGD    | 10                          | Morder                                                                                                                                                               |

|                                                   |        |    |              |
|---------------------------------------------------|--------|----|--------------|
| Health managers<br>(AKHSP, AKF-P<br>& Government) | 7 KIIs | 07 | Chitral city |
|---------------------------------------------------|--------|----|--------------|

Purposive sampling technique was adopted, inviting the participation of those CMWs, and TBAs who had been serving actively in their local communities for the last two years. These health workers were identified with the help of health managers of AKHSP and government. Likewise, only those members of VHC were invited for FGD, who had been active for the last two years. Each participant of the FGD and KII was given the verbal information about the study by the research team and was given a consent form prior to participation.

#### **d) Data analysis**

A qualitative content analysis was applied to analyze the information manually from all the FGDs and KIIs. A stepwise approach was adopted for the content analysis. The analysis aimed at finding manifest and latent meaning of data. The transcribed data was initially read several times by the principal researcher in order to find the sense of the whole. At first stage the segmentation of information was done i.e. segments and sub-segments of information were organized. Subsequently the significant information was extracted which was related to research questions. At second stage the common views of the respondents were put together at one place. At third stage, data was coded (different responses highlighted) and then these codes were grouped into categories and abstracted into sub-themes and a main theme. At final stage, the meanings of themes/descriptions were interpreted by keeping in view and considering the cultural context of the participants.

#### **Results**

The main theme which came out was the “emerging role of TBAs to improve Maternal, Newborn and Child Health”. After content analysis, following sub-themes were identified as shown in Table 2:

1. Community experience with CMWs and TBAs
2. View of participants on utilization of TBAs in formal health system
3. Role of TBAs in supporting obstetric care
4. Linkages and coordination among TBAs and CMWs

## 5. Livelihood of TBAs

**Table-2: Matrix of qualitative research analysis**

| <b>Nodes</b>                                  | <b>Sub-nodes</b>                                                                                                                                                                                                                                                                                                                                     |
|-----------------------------------------------|------------------------------------------------------------------------------------------------------------------------------------------------------------------------------------------------------------------------------------------------------------------------------------------------------------------------------------------------------|
| Community experience with CMWs and TBAs       | <ul style="list-style-type: none"> <li>- Availability of CMWs have empowered women for health care seeking</li> <li>- Community has trust and faith in TBAs and their services</li> </ul>                                                                                                                                                            |
| Linkage of TBAs with formal health system     | <ul style="list-style-type: none"> <li>-TBAs have pivotal role in health promotion activities such as health messages on breast feeding, mother and child immunization.</li> <li>-TBAs must assist CMW who is naïve to reproductive health matters.</li> <li>-TBAs can be involved in linking high risk cases to CMW and health facility.</li> </ul> |
| Role of TBAs in supporting obstetric care     | <ul style="list-style-type: none"> <li>- TBAs assist CMW in delivery, identify expectant mothers with high risks, refer such cases to formal health system, and support post-natal care</li> </ul>                                                                                                                                                   |
| Linkages and coordination among TBAs and CMWs | <ul style="list-style-type: none"> <li>- Mixed responses in terms of relationship between CMWs and TBAs</li> <li>- VHC is an active forum for coordination</li> <li>- Coordination is better at places where TBA gets some share of CMW income</li> </ul>                                                                                            |
| Livelihood of TBAs                            | <ul style="list-style-type: none"> <li>- CMWs could offer some incentives to TBAs to strengthen referrals and assistance in skilled delivery</li> <li>- VHCs decide TBA incentive share of CMW income</li> <li>- Community pay in kind contribution to recognize services of TBA</li> </ul>                                                          |

**Community experience with CMWs and TBAs**

Availability of CMWs and the supportive role of TBAs in obstetric care have benefited communities, by and large. Most of the respondents shared that availability of CMWs has empowered women in order to seek essential and emergency obstetric care in rural communities. Members of VHC appreciated the binding relation of CMWs with TBAs. Despite availability of CMWs, the community members still have greater trust and faith in TBAs who live and deals with the village women since ages. Some of the respondents told that they avail services of TBAs due to her rich experience as compared to CMWs who are young and yet naïve to various reproductive health matters.

1  
2  
3 “TBA still has the critical role as being more in proximity to the village women. She enjoys far more trust of  
4 the communities. She has a years’ long rapport with the families. People tend to follow her advice.”  
5  
6  
7 (Director Health, AKF-P)  
8  
9

10  
11 “I consider the role of TBAs important for two reasons; firstly they have been trusted by the communities,  
12 so they need to be taken on board for enhancing referrals to CMWs. Secondly, if they are not engaged  
13 properly then they will do more harm by doing deliveries and might spread negative propaganda too  
14 about the CMWs”. (KII-AKF-P Senior Program Officer)  
15  
16  
17  
18

19  
20  
21 “I take my wife and child to CMW to see for medical help or treatment for maternal and child health  
22 problems? In our village, Dai (TBA) enjoys good relationship with the CMW”. (FGD-VHC, Morder)”  
23  
24  
25

26  
27 “My family often seeks services from a TBA...she has all the experience.” (FGD-VHC, Morder)  
28  
29

30  
31 “The TBAs are working since long time and they have developed trust in the communities”. (KII, AKHSP  
32 Manager)  
33  
34  
35

### 36 **Linkage of TBAs with formal health system**

37  
38 Viewpoints of participants revealed that TBAs can be mainstreamed in a formal health system by  
39 assigning health promotion activities and for referring high risk cases to CMW and health facility.  
40  
41  
42

43  
44 “The TBAs have role in referring of high risk cases and expectant mothers for delivery to CMWs. TBAs  
45 are also playing very good role in the community in identifying pregnant mothers during 1<sup>st</sup> trimester in the  
46 community, arranging TT vaccinations and providing education on nutrition during pregnancy.” (GM,  
47 AKHSP)  
48  
49  
50  
51

52  
53  
54 “They (TBAs) must be linked with the formal health system especially for health promotion, referrals and  
55 assisting deliveries with CMWs, when needed” (FGD-VHC, Morder)  
56  
57  
58  
59  
60

### **Role of TBAs in supporting obstetric care**

TBAs have pivotal role in terms of identifying pregnancy related complications and assisting safe obstetric care services with CMWs. Traditionally, TBAs have been involved in the promotion of better nutrition practices for pregnant mothers, breastfeeding practices, TT vaccination of expectant mothers, prevention of neonatal hypothermia, and post-natal care including family planning. TBAs have a crucial role in strengthening referral and coordination mechanisms with CMWs and with the health facility. Findings of the KIIs and FGDs revealed that some TBAs were even involved in assisting deliveries with CMWs.

*“Many TBAs, no doubt have a sound folk wisdom, which can be used for various health promotion messages, especially where there is no other community health worker. Moreover, TBAs can be trained in providing antenatal care, TT vaccine, Misoprostol administration, recognizing the danger signs of pregnancy etc. This will give her a feeling that she still has a role to play in saving women’s lives.”*

*(Director Health, AKF-P)*

*“TBAs promote breastfeeding and healthy nutritional practices in our community for mother and children; and they can keep on doing that”. (FGD-VHC, Morder)*

*“In my village, TBA assists delivery with me and refers cases to me. I have to say that she is of great help for me”. (FGD-CMWs, Parsan)*

*“They (TBAs) said, they do refer cases to them and in many cases have joined CMWs for conducting deliveries.” (KII-AKF-P Senior Program Officer)*

### **Linkages and coordination mechanisms among TBAs and CMWs**

Lack of role clarity, physical inaccessibility, professional rivalry and few income opportunities are key factors for weak linkages between TBAs and CMWs. Some of the CMWs expressed that they



1  
2  
3 encountered problems and resistance from the TBAs and community during the initial phase of  
4 deployment. Village health committee shared that they invite both TBAs and CMWs in the VHC meetings.

5  
6  
7 *“Rivalry; both are birth attendants; one is practicing by virtue of folk knowledge and the other is trained*  
8 *according to modern guidelines and WHO standards. So that has created a competition. At places, there*  
9 *is coordination too, where both are from the same family or where both have realized each other’s*  
10 *importance.” (Director Health, AKF-P)*

11  
12  
13  
14  
15  
16  
17 *“The issues between TBA and CMW can be effectively dealt if AKHSP works with all stakeholders and set*  
18 *out a proper coordination plan, and play catalytic role to nurture a health relationship.” (KII-AKF-P, Senior*  
19 *Program Officer)*

20  
21  
22  
23  
24  
25 *“In some areas of intervention, the TBA perceived CMW as competitor.” (GM, AKHSP)*

26  
27  
28  
29 *“Introduction of CMWs in the areas will limit the role of TBAs. To cope with this challenge the TBAs were*  
30 *included in the VHCs and the roles/responsibilities of the CMWs were communicated through this*  
31 *platform”. (KII, AKRSP Manager)*

32  
33  
34  
35  
36  
37 Performance of TBAs vis-à-vis skills related to maternal and newborn health is not satisfactory. Therefore,  
38 they now go to the CMWs who have adequate competency in knowledge and skills about the obstetric  
39 care. Some of the members shared that TBAs refer complicated expectant mothers to CMWs and health  
40 facility. In few instances, TBA was seen to be assisting the CMW in deliveries. Nonetheless, where TBAs  
41 did not receive any share from the CMWs, we found weak coordination mechanisms with the formal  
42 health system.  
43  
44  
45  
46  
47

48  
49  
50  
51 *“Many TBAs are in favor of CMWs because they cannot handle the complicated cases properly; yet some*  
52 *are against her. VHC is trying to bring the TBA as member in VHC and told them about the importance of*  
53 *deliveries by skilled hand and hygienic way.” (FGD-VHC, Morder)*  
54  
55  
56  
57  
58  
59  
60

1  
2  
3 According to CMWs, they have high regard for the TBA, her experience and wisdom. They feel that TBA  
4 can complement their work. On the other hand, most TBAs are satisfied with CMWs work, skills and  
5 services rendered to the community women. Very few seem to be unhappy indeed.  
6  
7  
8  
9

### 10 11 **Livelihood and sustainability of TBAs**

12 Supporting role of TBAs is very important; especially in context of difficult geographical terrains in Chitral.  
13 Various options as well as mechanisms were identified by the respondents, when asked about livelihood  
14 prospects of TBAs. Most of the respondents were of opinion that CMWs must pay some incentives to  
15 TBAs to strengthen referrals and assistance in skilled delivery. Findings of the KII revealed that one of the  
16 available forums to decide TBAs incentives is village committee. VHCs and other available forums such  
17 as Local Support organizations (LSOs) can play pivotal role in taking up such decisive role for supporting  
18 livelihood options for TBAs. Regarding payment to TBAs, some of the CMWs did not recompense TBAs.  
19 Some of the TBAs also told that they get in kind contributions and support for her services from the village  
20 families and not from the CMWs.  
21  
22  
23  
24  
25  
26  
27  
28  
29  
30  
31  
32

33 *"It is an informal arrangement between the two of them. Officially there is no binding on the CMW to pay TBA for*  
34 *referrals."* (Director Health, AKF-P)  
35  
36  
37  
38

39 *"One of the CMW referred two cases to CMWs, and in fact she did join her for conducting the deliveries, but in*  
40 *return did not get anything from the CMW and the family too."* (KII-AKF-P, Senior Program Officer)  
41  
42  
43  
44

45 *"Let it be the VHC meeting to decide about some incentives to be given to TBAs from CMW fee, because*  
46 *she will be referring every case to CMW. CMW should provide some money to TBA".* (KII, AKHSP  
47 *Manager)*  
48  
49

50 *"TBAs were providing delivery services before CMWs' deployment; hence CMWs' services will certainly affect*  
51 *their regular income (in cash or in kind). CMW should give incentive from her service fee to TBAs on each*  
52 *referral; whereas TBA can continue providing care to mother after delivery".* (KII, Manager Programs, AKHSP)  
53  
54  
55  
56  
57  
58  
59  
60

1  
2  
3 *"In our area, CMW is paying Rs200 to the TBA for each referral". (FGD-VHC, Morder)*  
4  
5  
6

7 *"In two cases, I assisted CMW for delivery of a mother. CMW did not give me any money. I got some*  
8 *cash and chicken from the house of delivered mother". (FGD-TBA, Lower Porth)*  
9  
10

## 11 12 13 **Discussion**

14  
15 Though communities where CMWs are deployed after training are happy, yet the continued utilization of  
16 TBAs' services in Chitral. Fact is attributed to several factors including the TBAs' proximity to several  
17 villages, TBAs' respectful attitude toward the community, and flexible modes of payment (22,23). CMWs  
18 have been recently deployed in Chitral and experienced challenges and constraints by community based  
19 health providers and community itself in delivery of maternal health services (24,25). Evidence suggests  
20 that health management committees at the village level have been effective in reducing maternal  
21 complications through promoting linkages of health care providers with the community (26). The findings  
22 of our study also revealed that community forum in the form of VHC has played pivotal role in convincing  
23 the communities to avail CMW services and motivate the TBA to continue in supportive role in MNCH  
24 care. Awareness sessions have to be conducted on regular basis and on different forums to better inform  
25 the elder women and expecting mothers about the benefits of making use of skilled birth attendant i.e.  
26 CMW.  
27  
28  
29  
30  
31  
32  
33  
34  
35  
36  
37  
38  
39  
40

41 Results of our study found that TBAs play vital role in improving maternal health such as diagnosing  
42 labor, assisting clean delivery with CMWs, detecting and referring maternal complications, and promoting  
43 health messages. While trained TBAs are not considered skilled birth attendants, their potential  
44 contribution in supporting maternal care has been recognized in low income and middle countries facing  
45 issues of human response scarcity (12, **Error! Bookmark not defined.**). Role of TBAs in administration of  
46 misoprostol to prevent postpartum hemorrhage in home-births is oft-advocated (27,28). Nevertheless, the  
47 role of TBAs in supporting MNCH care cannot be neglected in settings where skilled birth attendants are  
48 fewer and new to health system. In the wake of reforms and the novel MNCH program of Pakistan, role of  
49 TBAs in improving maternal care and transforming health seeking behaviours ought to be promoted (29).  
50  
51  
52  
53  
54  
55  
56  
57  
58  
59  
60

1  
2  
3 Defining her role and contribution in the continuum of care is linked to her livelihood and income  
4 generation.  
5  
6

7  
8  
9 Improved linkages and relationship among CMWs and TBAs is of essence to flourish referral system from  
10 community to health facility. Better coordination and collaboration of TBAs with CMWs was promoted  
11 under CCSP, by sensitizing the CMW on prospective role of TBA which will complement her services and  
12 will help in building her rapport with the community. TBA, who has a long standing link with local  
13 community, can act as a bridge to strengthen referral mechanism between community and the formal  
14 health system (15). Findings of the qualitative study follow other studies which demonstrated that a formal  
15 partnership program among TBAs and the skilled midwives has yet to be seen (5) While the importance  
16 of the TBAs role in referral is universally acknowledged, most health systems have not developed an  
17 effective referral mechanism. The CCSP project provided an enabling forum at the village level for CMWs  
18 and TBAs to interact and improve referral linkages. Such partnership is crucial to improve access to  
19 health care services, especially for communities living in the remote areas. Nevertheless, training and  
20 monitoring TBAs on MNCH care is imperative to minimize chances of malpractices (13). Nevertheless,  
21 this training should be imparted by the government in its public sector nursing and midwifery schools.  
22 However, joint monitoring by AKHSP and government, by involving the village health committees could  
23 be instrumental in this regard. Moreover, participatory monitoring is always less threatening; and hence  
24 TBAs should be meaningfully engaged in such type of monitoring. A systematic recording and periodic  
25 analysis of information could be conducted by the TBAs themselves, with the help of public health  
26 experts. The aim is to measure progress and to make any corrections en route.  
27  
28  
29  
30  
31  
32  
33  
34  
35  
36  
37  
38  
39  
40  
41  
42  
43  
44  
45

46 Financial constraints are a major risk to the livelihood of TBAs as evident from the findings of our study.  
47 Mostly they are receiving in kind payments by the family of expectant mothers; and a nominal payment by  
48 CMWs for each referral. CMWs must keep a cushion of nominal payment to TBA, after verifying her  
49 services. That will surely help in building a healthy relationship amongst the two service providers. Where  
50 TBAs did not receive any share from the CMWs, we found weak coordination mechanisms with the formal  
51 health system. Evidence suggests that in kind contributions by clients are the most common mode of  
52  
53  
54  
55  
56  
57  
58  
59  
60

1  
2  
3 payment by the clients (8,10). With the increasing use of TBAs in MNCH care, the question of  
4 compensation has become more pressing because these workers usually rely on rewards and in kind  
5 contributions by the clients (30). Continuing efforts to define the role of TBAs may benefit from an  
6 emphasis on their potential as active promoters of essential newborn care (31). In the context of Pakistan,  
7 the role of TBAs ought to be revisited and redefined, not only for the sake of trust of communities on her  
8 services, but also for her own livelihood.  
9  
10  
11  
12  
13

### 14 15 16 17 **Conclusion**

18  
19 Prevailing poverty in the area calls for thinking solutions to ensure livelihood of TBAs, and to figure out an  
20 emerging role for her after the introduction of CMW in the health system. TBAs surely have solutions in  
21 the continuum of care for pregnant women, lactating mothers and children under five. They continue to  
22 take pride and see value in their role in the health system to support MNCH care. Health systems  
23 performance can be amplified by having a healthy interface between the TBAs and CMWs, and for the  
24 larger benefit of the communities served.  
25  
26  
27  
28  
29  
30  
31  
32

### 33 **Acknowledgement:**

34  
35 The authors acknowledge the facilitation and assistance provided by AKF-P, AKHSP and AKRSP to carry  
36 out field data collection.  
37  
38  
39

### 40 **Ethical consideration:**

41  
42 Ethics approval for this study was granted by the Institutional Review Board of Aga Khan Health Services,  
43 Pakistan. Verbal informed consent was obtained from all the study participants, after explaining the  
44 objectives of the study. Confidentiality and anonymity was assured to all the participants. Data was kept  
45 under lock and key with the principal researcher.  
46  
47  
48  
49  
50

### 51 **Authors' contributions**

52  
53  
54  
55  
56  
57  
58  
59  
60

1  
2  
3 BTS and SAK conceived the study design and instruments. AM supervised the data collection and helped  
4  
5 in analyses. BTS and SAK drafted the successive drafts of paper. SA conducted the critical review and  
6  
7 added the intellectual content to the paper. All authors read and approved the final draft.  
8  
9

10  
11 **Funding:** The study was a part of larger project “Chitral Child Survival Program” funded by USAID.  
12  
13

### 14 15 **Competing Interests**

16  
17 The authors declare that they have no competing interests.  
18  
19

### 20 21 **References**

- 
- 22  
23  
24 1. World Health Organization & UNICEF. Countdown to 2015 and beyond: fulfilling the health  
25 agenda for women and children. Geneva: 2014.  
26  
27 2. Shaikh BT. Marching toward the Millennium Development Goals: What about health systems,  
28 health-seeking behaviours and health service utilization in Pakistan? *World Health & Popul* 2008;  
29 10(2): 44-52.  
30  
31 3. United Nations. Road map towards the implementation of the United Nations Millennium  
32 Declaration: report of the Secretary-General. New York: 2001.  
33  
34 4. Sachs JD, McArthur JW. The Millennium Project: a plan for meeting the Millennium Development  
35 Goals. *Lancet* 2005; 365(9456):347-53.  
36  
37 5. Titaley CR, Hunter CL, Dibley MJ, Heywood P. Why do some women still prefer traditional birth  
38 attendants and home delivery? A qualitative study on delivery care services in West Java  
39 Province, Indonesia. *BMC Pregnancy Childbirth* 2010; 10:43.  
40  
41 6. Lassi ZS, Haider BA, Bhutta ZA. Community-based intervention packages for reducing maternal  
42 and neonatal morbidity and mortality and improving neonatal outcomes. *Cochrane Database Syst*  
43 *Rev* 2010; 11: CD007754.  
44  
45 7. Garces A, McClure EM, Chomba E, Patel A, Pasha O, Tshefu A. Home birth attendants in low  
46 income countries: who are they and what do they do? *BMC Pregnancy Childbirth* 2012; 12:34.  
47  
48  
49  
50  
51  
52  
53  
54  
55  
56  
57  
58  
59  
60

- 1  
2  
3  
4  
5  
6  
7  
8  
9  
10  
11  
12  
13  
14  
15  
16  
17  
18  
19  
20  
21  
22  
23  
24  
25  
26  
27  
28  
29  
30  
31  
32  
33  
34  
35  
36  
37  
38  
39  
40  
41  
42  
43  
44  
45  
46  
47  
48  
49  
50  
51  
52  
53  
54  
55  
56  
57  
58  
59  
60
8. Byrne A, Morgan A. How the integration of traditional birth attendants with formal health systems can increase skilled birth attendance. *Int J Gynaecol Obstet* 2011; 115(2):127-34.
9. Ray AM, Salihu HM. The impact of maternal mortality interventions using traditional birth attendants and village midwives. *J Obstet Gynaecol* 2004; 24(1):5-11.
10. Agarwal S, Sethi V, Srivastava K, Jha PK, Baqui AH. Birth preparedness and complication readiness among slum women in Indore City, India. *J Health Nutr Popul* 2010; 28(4): 383-391.
11. Wilson A, Gallos ID, Plana N, Lissauer D, Khan KS, Zamora J, et al. Effectiveness of strategies incorporating training and support of traditional birth attendants on perinatal and maternal mortality: meta-analysis. *BMJ* 2011; 343:d7102.
12. Sibley LM, Sipe TA. Transition to skilled birth attendance: Is there a future role for trained traditional birth attendants. *J Health Popul Nutr* 2006; 24(4):472-8.
13. Bisika T. The effectiveness of the TBA programme in reducing maternal mortality and morbidity in Malawi. *East Afr J Public Health* 2008; 5(2):103–10.
14. Chalo RN, Salihu HM, Nabukera S, Zirabamuzaale C. Referral of high-risk pregnant mothers by trained traditional birth attendants in Buikwe County, Mukono District, Uganda. *J Obstet Gynaecol* 2005; 25(6):554-7.
15. Temesgen TM, Umer JY, Buda DS, Haregu TN. Contribution of traditional birth attendants to the formal health system in Ethiopia: the case of Afar region. *Pan Afr Med J* 2012; 13(Suppl 1):15.
16. Wajid A, Rashid Z, Mir AM. Initial assessment of Community Midwives in rural Pakistan. PAIMAN. JSI Research and Training Institute, Inc; Islamabad: 2010.
17. Concern Worldwide. Examining the role of traditional birth attendants in the continuum of care in Sierra Leone. Innovations for maternal, newborn and child health. Policy Brief. Concern Worldwide; New York: 2013.
18. National Institute of Population Studies and Macro International Inc. Pakistan Demographic and Health Survey (PDHS) 2006–07. Government of Pakistan; Islamabad: 2008.
19. Government of Pakistan. PC1 National Maternal Newborn & Child health Program 2006-2012. Ministry of Health, Government of Pakistan; Islamabad: 2009.



20. Research and Development Solutions. The community midwives program in Pakistan. Policy Brief Series No 20. Islamabad: 2012.
21. Department of Health. District health profile-Chitral. Government of Khyber Pakhtunkhwa; Peshawar: 2014.
22. Chesney M, Davies S. Women's birth experiences in Pakistan – the importance of the Dai. The Royal College of Midwives. *Evid Based Midwifery* 2005; 3(1):26-32.
23. Owolabi OO, Glenton C, Lewin S, Pakenham-Walsh N. Stakeholder views on the incorporation of traditional birth attendants into the formal health systems of low-and middle-income countries: a qualitative analysis of the HIFA2015 and CHILD2015 email discussion forums. *BMC Pregnancy Childbirth* 2014; 14:118.
24. Sarfraz M, Hamid S. Challenges in delivery of skilled maternal care-Experiences of community midwives in Pakistan. *BMC Pregnancy Childbirth* 2014; 14:59.
25. Research and Advocacy Fund/Children First. How far can I go? Social mobility of CMWs in Azad Kashmir. Islamabad: 2012.
26. Morrison J, Tumbahangphe KM, Budhathoki B, Neupane R, Sen A, Dahal K, et al. Community mobilization and health management committee strengthening to increase birth attendance by trained health workers in rural Makwanpur, Nepal: study protocol for a cluster randomized controlled trial. *Trials* 2011; 12:128.
27. Walraven G, Blum J, Dampha Y, Sowe M, Morison L, Winikoff B, et al. Misoprostol in the management of the third stage of labour in the home delivery setting in rural Gambia: a randomized controlled trial. *Br J Obstet Gynaecol* 2005; 112: 1277-83.
28. Mobeen N, Durocher J, Zuberi N, Jahan N, Blum J, Wasim S, et al. Administration of misoprostol by trained traditional birth attendants to prevent postpartum hemorrhage in homebirths in Pakistan: a randomized placebo-controlled trial. *BJOG* 2011; 118(3):353-61.
29. Shaikh BT, Haran D, Hatcher J. Women's social position and health-seeking behaviors: Is the health care system accessible and responsive in Pakistan? *Health Care Women Int* 2008; 29:945-959.



- 
- 1  
2  
3  
4  
5  
6  
7  
8  
9  
10  
11  
12  
13  
14  
15  
16  
17  
18  
19  
20  
21  
22  
23  
24  
25  
26  
27  
28  
29  
30  
31  
32  
33  
34  
35  
36  
37  
38  
39  
40  
41  
42  
43  
44  
45  
46  
47  
48  
49  
50  
51  
52  
53  
54  
55  
56  
57  
58  
59  
60
30. Gill CJ, Phiri-Mazala G, Guerina NG, Kasimba J, Mulenga C, MacLeod WB. Effect of training traditional birth attendants on neonatal mortality (Lufwanyama Neonatal Survival Project): randomized controlled study. *BMJ* 2011; 342:d346.
31. Falle TY, Mulany LC, Thatte N, Khatri SK, LeClerg SC, Darmstadt GL, et al. Potential role of traditional birth attendants in neonatal healthcare in rural southern Nepal. *J Health Popul Nutr* 2009; 27(1): 53–61.

1  
2  
3  
4  
5  
6  
7  
8  
9  
10  
11  
12  
13  
14  
15  
16  
17  
18  
19  
20  
21  
22  
23  
24  
25  
26  
27  
28  
29  
30  
31  
32  
33  
34  
35  
36  
37  
38  
39  
40  
41  
42  
43  
44  
45  
46  
47  
48  
49  
50  
51  
52  
53  
54  
55  
56  
57  
58  
59  
60

Emerging role of traditional birth attendants in mountainous terrain: A qualitative exploratory study ~~of~~ from Chitral District, Pakistan

Babar Tasneem Shaikh, MPH, PhD, FRCP Edin

Sharifullah Khan, MPH

Ayesha Maab, MSc

Sohail Amjad, MA-HM, MA-HMPP

Running title: Role of traditional birth attendants

**Corresponding author**

**Dr Babar Tasneem Shaikh**

Aga Khan Foundation (Pakistan)

Level Nine, Serena Business Complex

Khayaban-e-Suharwardy, Islamabad

t: +92 51 111-253-254

f: +92 51 2072552

e: [shaikh.babar@gmail.com](mailto:shaikh.babar@gmail.com)

**Abstract:**

**Objectives:** This research endeavors to to identify the role of TBAs in supporting the MNCH care, partnership mechanism with the formal health system and also explored livelihood options for TBAs~~re-define the role of Traditional Birth Attendants (TBAs) in supporting the Maternal Newborn & Child Health (MNCH) care now provided mainly by the trained community midwives (CMWs), to mainstream TBAs with the formal health system and to delineate their livelihood prospects, after the deployment and introduction of CMWs~~ in the health system of Pakistan.

**Setting:** The study was conducted in District Chitral, Khyber Pakhtunkhwa province, covering the areas where Chitral Child Survival programme was implemented.

**Participants:** A qualitative exploratory study was conducted, comprising seven Key informant interviews (KIs) with health managers, and four focus group discussions (FGDs) ~~with CMWs, TBAs,~~ members of CBSG and members of Village Health Committees (VHCs).

**Results:** The study identified that In the new scenario, after the introduction of CMW in the health system, TBAs still have a pivotal role in health promotion activities such as breast feeding promotion and vaccination. TBAs can assist CMWs in normal deliveries, and refer high risk cases to formal health system. Generally, TBAs are positive about CMWs' introduction and welcome this addition. Yet, their livelihood has suffered after CMWs deployment. Monetary incentives to them in recognition of referrals to CMWs could be one solution. VHC is an active forum for strengthening coordination between the two service providers and to ensure an alternate and permanent livelihood support system for the TBAs.

**Conclusion:** TBAs assured their continued support in provision of continuum of care for pregnant women, lactating mothers and children under five. The district health authorities must figure out ways to foster a healthy interface vis-à-vis roles and responsibilities of TBAs and CMWs. After some time, it would be worthwhile to do further research to look into the CMW's integration in the system, as well as TBA's continued role for provision of MNCH care.

1  
2  
3  
4  
5  
6  
7  
8  
9  
10  
11  
12  
13  
14  
15  
16  
17  
18  
19  
20  
21  
22  
23  
24  
25  
26  
27  
28  
29  
30  
31  
32  
33  
34  
35  
36  
37  
38  
39  
40  
41  
42  
43  
44  
45  
46  
47  
48  
49  
50  
51  
52  
53  
54  
55  
56  
57  
58  
59  
60

**Keywords:** Maternal Newborn & Child Health, Traditional birth attendant, Community midwife, Qualitative research, Pakistan.

### **Strengths & Limitations of the study**

A study, first of its kind, which has expounded on the subject of TBAs role and livelihood after the introduction of trained MNCH providers in Pakistan. Use of qualitative methods provided rich insight into women's interpretations and decision-making regarding health care seeking during and after pregnancy in a relatively conservative setting of Pakistan. Study presents views of all stakeholders involved in the intervention.

The findings represent a specific sample size, study site and socio-cultural milieu and therefore may not be generalized for the entire province or country. Health providers involved in the study were mainly from AKHSP and government who were already exposed to this intervention. Only few TBAs could be gathered for discussion, because most of them were remotely located, and weather and family constraints did not allow them to travel. Moreover, the prospective role of TBA is discussed in a special context, whereby a CMW was trained and deployed in the area for increasing skilled birth attendance.

## Introduction

Despite all advances toward MDGs 4 & 5, every year 6.6 million children die before five years of age (44% as newborns) and 289,000 maternal deaths occur, mostly from preventable causes (1). This state of affairs has raised serious global concern over the years in developing countries to ensure availability and accessibility of human resources for ensuring continuum of care for expecting mothers. Uniform availability and distribution of skilled birth attendants is critical to consider while looking at health service utilization trends (2). The Millennium Declaration in 2000 signed by 189 nations, recognized proportion of births assisted by trained birth as an important indicator to track maternal and child survival indicators (3,4). To increase the availability and accessibility of maternal and child health care services, training of TBAs and strengthening the partnership between community midwives (CMWs) and TBAs is widely acknowledged worldwide (5,6). Nonetheless, role of the TBAs cannot be effective in a weak primary health care system and in an unplanned referral mechanism (7).

In order to attain MDG-5, isolated interventions are not able to reduce maternal mortality sufficiently. It is important to review strategies to maximize strengths of TBAs as well and skilled birth attendants. Evidence suggests that skilled birth attendance has increased in regions where TBAs are integrated with the formal health system (8). However, integration of TBAs with the formal health system may require capacity development and supervision of TBAs, collaboration skills for health workers, involvement of TBAs at health facilities and, improved capacity on communication and referral systems. With this approach, TBAs may positively contribute to maternal and child health outcomes (9). Trainings of the TBAs not only enhance their knowledge and skills on obstetric care and referral mechanism, but also lead to greater community acceptance and a greater consumer satisfaction. They can play a vital role in birth preparedness and identification of danger signs (10). Training of TBAs has shown impact on perinatal and neonatal deaths which can be significantly reduced (11). Moreover, TBAs have been a critical contributor in providing skilled maternal, newborn and child health (MNCH) care in rural population of developing countries due to inadequate numbers of human resource for service delivery (12). Therefore, role of trained TBAs in healthcare provision cannot be undermined. Developing countries have used TBAs as a key strategy to improve maternal and child health care (13). They have been effective in

1  
2  
3  
4  
5  
6  
7  
8  
9  
10  
11  
12  
13  
14  
15  
16  
17  
18  
19  
20  
21  
22  
23  
24  
25  
26  
27  
28  
29  
30  
31  
32  
33  
34  
35  
36  
37  
38  
39  
40  
41  
42  
43  
44  
45  
46  
47  
48  
49  
50  
51  
52  
53  
54  
55  
56  
57  
58  
59  
60

improving referral mechanism and links with the formal health care system (14). Literature review has suggested that a TBA is preferred over a midwife who is young, unmarried girl and without children. This trend is more common in countries where fresh CMWs are recently deployed such as Pakistan (15,16). Another reason for the community acceptance of TBAs is that they are affordable option than professional midwives and she often accepts payment in kind (17). Moreover, TBAs are always happy to make house visits, warranting mother's privacy.

Pakistan is among the few countries in South Asia that continues to have dismal maternal and child health indicators. In Pakistan, Maternal Mortality Ratios (MMR) is high, ranging from 240 to 700 per 100,000 live births. The top three causes of maternal death are postpartum hemorrhage, eclampsia and sepsis. Approximately two-thirds of all births (61%) take place at home due to limited access to health facilities. Home based deliveries are usually attended by the TBA and now newly deployed community midwives in some rural parts of the country (18). While some maternity care indicators appear to have improved over the last two decades, women's access to prenatal health care continues to be low in Pakistan<sup>18</sup>.

Realizing the need for community health work force, Government of Pakistan launched the national MNCH program in 2006 to help the rural women deliver safely (19). Although the program has been successful in countries such as Malaysia and Indonesia, challenges faced by the CMW program of Pakistan are multifaceted. These challenges are related to acceptance by community, competition with other service providers, weak referral system, inadequate skill set and lack of community involvement (20).

### **The intervention**

To address health system constraints, Chitral Child Survival Program (CCSP) of Aga Khan Foundation Pakistan (AKF-P) deployed CMWs, supported community financing scheme, improved referral linkages and implemented a behavior change communication campaign from 2008-2014. CCSP was implemented in close partnership of Department of Health, Khyber Pakhtunkhwa, Aga Khan Health Services Pakistan

1  
2  
3  
4  
5  
6  
7  
8  
9 (AKHSP), and Aga Khan Rural Support Program (AKRSP). The CCSP interventions, especially the role of  
10 community based saving groups, village health committees (VHCs) and community based emergency  
11 maternal referral mechanism to achieve project results showed that CCSP had attempted to engage the  
12 TBAs proactively. The project empowered TBAs on Birth Preparedness and Complications Readiness  
13 (BPCR) plans and integrated referral mechanisms. Involvement of TBAs in the project was meaningful to  
14 generate the community acceptability for young CMWs, identification of high risk cases, and referrals of  
15 complications to CMW and transporting pregnant woman to health facility in time.  
16  
17  
18  
19

20  
21 This research endeavored to identify the role of TBAs in supporting the MNCH care, partnership  
22 mechanism with the formal health system and also explored livelihood options for TBAs.  
23  
24  
25

## 26 **Methodology**

### 27 **a) Study site**

28 The study was conducted in Chitral district, north western border of Pakistan, from March-April 2014.  
29 The population of the intervention area is 200,000, about 57% of the total population of the district  
30 and residing in 243 villages. The government department of health and Aga Khan Health Services  
31 Pakistan (AKHSP) are the two primary formal sector healthcare providers in Chitral. The public-sector  
32 healthcare infrastructure in the district includes 22 civil dispensaries, 21 basic health units; three tehsil  
33 headquarters and one district headquarter hospital (21). AKHSP operates its own 32 health facilities  
34 in Chitral which include 17 health centers, eight family health centers, four dispensaries and three  
35 secondary care facilities, covering 60% of Chitral district. The MMR in the province is 275/100,000  
36 live births; whereas under five mortality is 75/1000 live births (1849). Despite the presence of skilled  
37 birth attendants under MNCH program, large proportion of the deliveries is still attended by TBAs in  
38 Chitral district.  
39  
40  
41  
42  
43  
44  
45  
46  
47

### 48 **b) Study Design and data collection**

49 The project documents and other relevant studies were thoroughly reviewed and the collated  
50 information guided to design the qualitative data collection instruments. A qualitative exploratory  
51  
52  
53  
54  
55  
56  
57  
58  
59  
60

study entailed seven KIIs and four FGDs conducted with different study participants. The questions for focus group discussion (FGD) and key informants interview (KIIs) explore the role of TBAs in supporting MNCH care and CCSP project activities, community experience with TBAs, TBAs' relationship and coordination with the CMWs, referral of cases; remuneration and livelihood sources of TBAs; ways to engage TBAs in continuum of care, working relationships and linkages with the formal health system, and sustainability/livelihood of TBAs. Using a participation diagram in FGDs, it was ensured that nobody is missed out and that all the participants must speak on each question. To ensure quality control, information collected through note-taking was cross-checked for completeness and consistency before and during data processing by the research team.

### c) *Study participants*

All the study participants were purposively sampled from the intervention areas in the district, with the help of the implementing agencies on ground. Community based health workers i.e. CMWs and TBAs; members of VHC and Community Based Saving Group (CBSG) were included in the discussion. The participants were encouraged by the moderator (PI) to interact with each other and comment on experiences and perceptions regarding role of TBAs, partnership with formal health system, and livelihood of TBAs. KIIs were conducted with two government health managers, two AKF-P managers, and three AKHSP managers. All the FGDs were conducted in the community; whereas KIIs were conducted in the respective offices of health managers. Table-1 presents the detail of the methods employed for the study.

**Table-1: Detail of methods employed in qualitative study**

| Cadre | Method | Total number of respondents | Village                                                                                                                                                              |
|-------|--------|-----------------------------|----------------------------------------------------------------------------------------------------------------------------------------------------------------------|
| CMWs  | FGD    | 10                          | Mori Lshat, Barini, Awi, Miragarm, Sore Laspoor, Raman, Terich Payeen, Lot Owir Bala, Lot Owir Payeen, Gohkir, Parsan, Owir Lasht Arkari, Besti Arkari, Khuz, Phashk |
| TBAs  | FGD    | 5                           | Lower Porth, Brock Kalaway, Porth Bala, Raman, Brock Baraman Deh                                                                                                     |
| VHC   | FGD    | 8                           | Morder                                                                                                                                                               |
| CBSG  | FGD    | 10                          | Morder                                                                                                                                                               |



|                                             |        |    |              |
|---------------------------------------------|--------|----|--------------|
| Health managers (AKHSP, AKF-P & Government) | 7 KIIs | 07 | Chitral city |
|---------------------------------------------|--------|----|--------------|

Purposive sampling technique was adopted, inviting the participation of those CMWs, and TBAs who had been serving actively in their local communities for the last two years. These health workers were identified with the help of health managers of AKHSP and government. Likewise, only those members of VHC were invited for FGD, who had been active for the last two years. Each participant of the FGD and KII was given the verbal information about the study by the research team and was given a consent form prior to participation.

#### **d) Data analysis**

A qualitative content analysis was applied to analyze the information manually from all the FGDs and KIIs. A stepwise approach was adopted for the content analysis. The analysis aimed at finding manifest and latent meaning of data. The transcribed data was initially read several times by the principal researcher in order to find the sense of the whole. At first stage the segmentation of information was done i.e. segments and sub-segments of information were organized. Subsequently the significant information was extracted which was related to research questions. At second stage the common views of the respondents were put together at one place. At third stage, data was coded (different responses highlighted) and then these codes were grouped into categories and abstracted into sub-themes and a main theme. At final stage, the meanings of themes/descriptions were interpreted by keeping in view and considering the cultural context of the participants.

#### **Results**

The main theme which came out was the "emerging role of TBAs to improve Maternal, Newborn and Child Health". After content analysis, following sub-themes were identified as shown in Table 2:

1. Community experience with CMWs and TBAs
2. View of participants on utilization of TBAs in formal health system
3. Role of TBAs in supporting obstetric care
4. Linkages and coordination among TBAs and CMWs

## 5. Livelihood of TBAs

**Table-2: Matrix of qualitative research analysis**

| Nodes                                         | Sub-nodes                                                                                                                                                                                                                                                                                                                                            |
|-----------------------------------------------|------------------------------------------------------------------------------------------------------------------------------------------------------------------------------------------------------------------------------------------------------------------------------------------------------------------------------------------------------|
| Community experience with CMWs and TBAs       | <ul style="list-style-type: none"> <li>- Availability of CMWs have empowered women for health care seeking</li> <li>- Community has trust and faith in TBAs and their services</li> </ul>                                                                                                                                                            |
| Linkage of TBAs with formal health system     | <ul style="list-style-type: none"> <li>-TBAs have pivotal role in health promotion activities such as health messages on breast feeding, mother and child immunization.</li> <li>-TBAs must assist CMW who is naïve to reproductive health matters.</li> <li>-TBAs can be involved in linking high risk cases to CMW and health facility.</li> </ul> |
| Role of TBAs in supporting obstetric care     | <ul style="list-style-type: none"> <li>- TBAs assist CMW in delivery, identify expectant mothers with high risks, refer such cases to formal health system, and support post-natal care</li> </ul>                                                                                                                                                   |
| Linkages and coordination among TBAs and CMWs | <ul style="list-style-type: none"> <li>- Mixed responses in terms of relationship between CMWs and TBAs</li> <li>- VHC is an active forum for coordination</li> <li>- Coordination is better at places where TBA gets some share of CMW income</li> </ul>                                                                                            |
| Livelihood of TBAs                            | <ul style="list-style-type: none"> <li>- CMWs could offer some incentives to TBAs to strengthen referrals and assistance in skilled delivery</li> <li>- VHCs decide TBA incentive share of CMW income</li> <li>- Community pay in kind contribution to recognize services of TBA</li> </ul>                                                          |

**Community experience with CMWs and TBAs**

Availability of CMWs and the supportive role of TBAs in obstetric care have benefited communities, by and large. Most of the respondents shared that availability of CMWs has empowered women in order to seek essential and emergency obstetric care in rural communities. Members of VHC appreciated the binding relation of CMWs with TBAs. Despite availability of CMWs, the community members still have greater trust and faith in TBAs who live and deals with the village women since ages. Some of the respondents told that they avail services of TBAs due to her rich experience as compared to CMWs who are young and yet naïve to various reproductive health matters.

1  
2  
3  
4  
5  
6  
7  
8  
9 *"TBA still has the critical role as being more in proximity to the village women. She enjoys far more trust of*  
10 *the communities. She has a years' long rapport with the families. People tend to follow her advice."*  
11  
12 *(Director Health, AKF-P)*

13  
14  
15 *"I consider the role of TBAs important for two reasons; firstly they have been trusted by the communities,*  
16 *so they need to be taken on board for enhancing referrals to CMWs. Secondly, if they are not engaged*  
17 *properly then they will do more harm by doing deliveries and might spread negative propaganda too*  
18 *about the CMWs". (KII-AKF-P Senior Program Officer)*

19  
20  
21  
22  
23 *"I take my wife and child to CMW to see for medical help or treatment for maternal and child health*  
24 *problems? In our village, Dai (TBA) enjoys good relationship with the CMW". (FGD-VHC, Morder)"*

25  
26  
27  
28 *"My family often seeks services from a TBA...she has all the experience." (FGD-VHC, Morder)*

29  
30  
31 *"The TBAs are working since long time and they have developed trust in the communities". (KII, AKHSP*  
32 *Manager)*

### 33 34 35 **Linkage of TBAs with formal health system**

36  
37 ~~TBAs have pivotal role in health promotion activities such as health messages on nutrition, breast~~  
38 ~~feeding, and vaccination promotion.~~ Viewpoints of participants revealed that TBAs can be mainstreamed  
39  
40 in a formal health system by assigning health promotion activities and for referring high risk cases to  
41 CMW and health facility.

42  
43  
44  
45 *"The TBAs have role in referring of high risk cases and expectant mothers for delivery to CMWs. TBAs*  
46 *are also playing very good role in the community in identifying pregnant mothers during 1<sup>st</sup> trimester in the*  
47 *community, arranging TT vaccinations and providing education on nutrition during pregnancy." (GM,*  
48 *AKHSP)*

1  
2  
3  
4  
5  
6  
7  
8  
9 *"They (TBAs) must be linked with the formal health system especially for health promotion, referrals and*  
10 *assisting deliveries with CMWs, when needed"* (FGD-VHC, Morder)

### 13 **Role of TBAs in supporting obstetric care**

14  
15 TBAs have pivotal role in terms of identifying pregnancy related complications and assisting safe obstetric  
16 care services with CMWs. Traditionally, TBAs have been involved in the promotion of better nutrition  
17 practices for pregnant mothers, breastfeeding practices, TT vaccination of expectant mothers, prevention  
18 of neonatal hypothermia, and post-natal care including family planning. TBAs have a crucial role in  
19 strengthening referral and coordination mechanisms with CMWs and with the health facility. Findings of  
20 the KIIs and FGDs revealed that some TBAs were even involved in assisting deliveries with CMWs.

21  
22  
23  
24  
25  
26 *"Many TBAs, no doubt have a sound folk wisdom, which can be used for various health promotion*  
27 *messages, especially where there is no other community health worker. Moreover, TBAs can be trained*  
28 *in providing antenatal care, TT vaccine, Misoprostol administration, recognizing the danger signs of*  
29 *pregnancy etc. This will give her a feeling that she still has a role to play in saving women's lives."*  
30  
31  
32 (Director Health, AKF-P)

33  
34  
35  
36 *"TBAs promote breastfeeding and healthy nutritional practices in our community for mother and children;*  
37 *and they can keep on doing that".* (FGD-VHC, Morder)

38  
39  
40  
41 *"In my village, TBA assists delivery with me and refers cases to me. I have to say that she is of great help*  
42 *for me".* (FGD-CMWs, Parsan)

43  
44  
45 *"They (TBAs) said, they do refer cases to them and in many cases have joined CMWs for conducting*  
46 *deliveries."* (KII-AKF-P Senior Program Officer)

### 49 **Linkages and coordination mechanisms among TBAs and CMWs**

1  
2  
3  
4  
5  
6  
7  
8  
9 Lack of role clarity, physical inaccessibility, professional rivalry and few income opportunities are key  
10 factors for weak linkages between TBAs and CMWs. Some of the CMWs expressed that they  
11 encountered problems and resistance from the TBAs and community during the initial phase of  
12 deployment. Village health committee shared that they invite both TBAs and CMWs in the VHC meetings.  
13

14  
15 ~~Performance of TBAs vis-à-vis skills related to maternal and newborn health is not satisfactory. Therefore,~~  
16 ~~they now go to the CMWs who have adequate competency in knowledge and skills about the obstetric~~  
17 ~~care. Some of the members shared that TBAs refer complicated expectant mothers to CMWs and health~~  
18 ~~facility. In few instances, TBA was seen to be assisting the CMW in deliveries.~~  
19

20  
21  
22  
23 *"Rivalry; both are birth attendants; one is practicing by virtue of folk knowledge and the other is trained*  
24 *according to modern guidelines and WHO standards. So that has created a competition. At places, there*  
25 *is coordination too, where both are from the same family or where both have realized each other's*  
26 *importance."* (Director Health, AKF-P)  
27  
28

29  
30  
31 *"The issues between TBA and CMW can be effectively dealt if AKHSP works with all stakeholders and set*  
32 *out a proper coordination plan, and play catalytic role to nurture a health relationship."* (KII-AKF-P, Senior  
33 *Program Officer)*  
34

35  
36  
37 *"In some areas of intervention, the TBA perceived CMW as competitor."* (GM, AKHSP)  
38

39  
40  
41 *"Introduction of CMWs in the areas will limit the role of TBAs. To cope with this challenge the TBAs were*  
42 *included in the VHCs and the roles/responsibilities of the CMWs were communicated through this*  
43 *platform".* (KII, AKRSP Manager)  
44

45  
46 Performance of TBAs vis-à-vis skills related to maternal and newborn health is not satisfactory. Therefore,  
47 they now go to the CMWs who have adequate competency in knowledge and skills about the obstetric  
48 care. Some of the members shared that TBAs refer complicated expectant mothers to CMWs and health  
49 facility. In few instances, TBA was seen to be assisting the CMW in deliveries. Nonetheless, where TBAs  
50  
51  
52

1  
2  
3  
4  
5  
6  
7  
8  
9  
10  
11  
12  
13  
14  
15  
16  
17  
18  
19  
20  
21  
22  
23  
24  
25  
26  
27  
28  
29  
30  
31  
32  
33  
34  
35  
36  
37  
38  
39  
40  
41  
42  
43  
44  
45  
46  
47  
48  
49  
50  
51  
52  
53  
54  
55  
56  
57  
58  
59  
60

did not receive any share from the CMWs, we found weak coordination mechanisms with the formal health system.

*“Many TBAs are in favor of CMWs because they cannot handle the complicated cases properly; yet some are against her. VHC is trying to bring the TBA as member in VHC and told them about the importance of deliveries by skilled hand and hygienic way.” (FGD-VHC, Morder)*

According to CMWs, they have high regard for the TBA, her experience and wisdom. They feel that TBA can complement their work. On the other hand, most TBAs are satisfied with CMWs work, skills and services rendered to the community women. Very few seem to be unhappy indeed.

#### **Livelihood and sustainability of TBAs**

Supporting role of TBAs is very important; especially in context of difficult geographical terrains in Chitral. Various options as well as mechanisms were identified by the respondents, when asked about livelihood prospects of TBAs. Most of the respondents were of opinion that CMWs must pay some incentives to TBAs to strengthen referrals and assistance in skilled delivery. Findings of the KII revealed that one of the available forums to decide TBAs incentives is village committee. VHCs and other available forums such as Local Support organizations (LSOs) can play pivotal role in taking up such decisive role for supporting livelihood options for TBAs. Regarding payment to TBAs, some of the CMWs did not recompense TBAs. Some of the TBAs also told that they get in kind contributions and support for her services from the village families and not from the CMWs.

*“It is an informal arrangement between the two of them. Officially there is no binding on the CMW to pay TBA for referrals.” (Director Health, AKF-P)*

*“One of the CMW referred two cases to CMWs, and in fact she did join her for conducting the deliveries, but in return did not get anything from the CMW and the family too.” (KII-AKF-P, Senior Program Officer)*

1  
2  
3  
4  
5  
6  
7  
8  
9 *"Let it be the VHC meeting to decide about some incentives to be given to TBAs from CMW fee, because*  
10 *she will be referring every case to CMW. CMW should provide some money to TBA". (KII, AKHSP*  
11 *Manager)*

12  
13 *"TBAs were providing delivery services before CMWs' deployment; hence CMWs' services will certainly affect*  
14 *their regular income (in cash or in kind). CMW should give incentive from her service fee to TBAs on each*  
15 *referral; whereas TBA can continue providing care to mother after delivery". (KII, Manager Programs, AKHSP)*

16  
17  
18  
19  
20 *"In our area, CMW is paying Rs200 to the TBA for each referral". (FGD-VHC, Morder)*

21  
22  
23 *"In two cases, I assisted CMW for delivery of a mother. CMW did not give me any money. I got some*  
24 *cash and chicken from the house of delivered mother". (FGD-TBA, Lower Porth)*

## 25 26 27 **Discussion**

28  
29 Though communities where CMWs are deployed after training are happy, yet the continued utilization of  
30 TBAs' services in Chitral. Fact is attributed to several factors including the TBAs' proximity to several  
31 villages, TBAs' respectful attitude toward the community, and flexible modes of payment (22,23). CMWs  
32 have been recently deployed in Chitral and experienced challenges and constraints by community based  
33 health providers and community itself in delivery of maternal health services (24,25). Evidence suggests  
34 that health management committees at the village level have been effective in reducing maternal  
35 complications through promoting linkages of health care providers with the community (26). The findings  
36 of our study also revealed that community forum in the form of VHC has played pivotal role in convincing  
37 the communities to avail CMW services and motivate the TBA to continue in supportive role in MNCH  
38 care. Awareness sessions have to be conducted on regular basis and on different forums to better inform  
39 the elder women and expecting mothers about the benefits of making use of skilled birth attendant i.e.  
40 CMW.

41  
42  
43  
44  
45  
46  
47  
48  
49 Results of our study found that TBAs play vital role in improving maternal health such as diagnosing  
50 labor, assisting clean delivery with CMWs, detecting and referring maternal complications, and promoting

1  
2  
3  
4  
5  
6  
7  
8  
9  
10  
11  
12  
13  
14  
15  
16  
17  
18  
19  
20  
21  
22  
23  
24  
25  
26  
27  
28  
29  
30  
31  
32  
33  
34  
35  
36  
37  
38  
39  
40  
41  
42  
43  
44  
45  
46  
47  
48  
49  
50  
51  
52  
53  
54  
55  
56  
57  
58  
59  
60

health messages. While trained TBAs are not considered skilled birth attendants, their potential contribution in supporting maternal care has been recognized in low income and middle countries facing issues of human response scarcity (12, [Error! Bookmark not defined.](#)<sup>13</sup>). Role of TBAs in administration of misoprostol to prevent postpartum hemorrhage in home-births is oft-advocated (27,28). Nevertheless, the role of TBAs in supporting MNCH care cannot be neglected in settings where skilled birth attendants are fewer and new to health system. In the wake of reforms and the novel MNCH program of Pakistan, role of TBAs in improving maternal care and transforming health seeking behaviours ought to be promoted (29). Defining her role and contribution in the continuum of care is linked to her livelihood and income generation.

Improved linkages and relationship among CMWs and TBAs is of essence to flourish referral system from community to health facility. Better coordination and collaboration of TBAs with CMWs was promoted under CCSP, by sensitizing the CMW on prospective role of TBA which will complement her services and will help in building her rapport with the community. TBA, who has a long standing link with local community, can act as a bridge to strengthen referral mechanism between community and the formal health system ([1524](#)). Findings of the qualitative study follow other studies which demonstrated that a formal partnership program among TBAs and the skilled midwives has yet to be seen ([56](#)). While the importance of the TBAs role in referral is universally acknowledged, most health systems have not developed an effective referral mechanism. The CCSP project provided an enabling forum at the village level for CMWs and TBAs to interact and improve referral linkages. Such partnership is crucial to improve access to health care services, especially for communities living in the remote areas. Nevertheless, training and monitoring TBAs on MNCH care is imperative to minimize chances of malpractices (13).

Nevertheless, this training should be imparted by the government in its public sector nursing and midwifery schools. Therefore However, joint monitoring by AKHSP and government, by involving the village health committees could be instrumental in this regard. Moreover, participatory monitoring is always less threatening; and hence TBAs should be meaningfully engaged in such type of monitoring. A systematic recording and periodic analysis of information could be conducted by the TBAs themselves.

Formatted: Font: (Default) Arial, 10 pt

Formatted: Font: (Default) Arial, 10 pt

Formatted: Font: (Default) Arial, 10 pt



1  
2  
3  
4  
5  
6  
7  
8  
9 with the help of public health experts. The aim is to measure progress and to make any corrections en  
10 route.  
11

12  
13  
14 Financial constraints are a major risk to the livelihood of TBAs as evident from the findings of our study.  
15 Mostly they are receiving in kind payments by the family of expectant mothers; and a nominal payment by  
16 CMWs for each referral. CMWs must keep a cushion of nominal payment to TBA, after verifying her  
17 services. That will surely help in building a healthy relationship amongst the two service providers. Where  
18 TBAs did not receive any share from the CMWs, we found weak coordination mechanisms with the formal  
19 health system. Evidence suggests that in kind contributions by clients are the most common mode of  
20 payment by the clients (89,104). With the increasing use of TBAs in MNCH care, the question of  
21 compensation has become more pressing because these workers usually rely on rewards and in kind  
22 contributions by the clients (30). Continuing efforts to define the role of TBAs may benefit from an  
23 emphasis on their potential as active promoters of essential newborn care (31). In the context of Pakistan,  
24 the role of TBAs ought to be revisited and redefined, not only for the sake of trust of communities on her  
25 services, but also for her own livelihood.  
26  
27  
28  
29  
30  
31  
32

### 33 34 **Conclusion**

35 Prevailing poverty in the area calls for thinking solutions to ensure livelihood of TBAs, and to figure out an  
36 emerging role for her after the introduction of CMW in the health system. TBAs surely have solutions in  
37 the continuum of care for pregnant women, lactating mothers and children under five. They continue to  
38 take pride and see value in their role in the health system to support MNCH care. Health systems  
39 performance can be amplified by having a healthy interface between the TBAs and CMWs, and for the  
40 larger benefit of the communities served.  
41  
42  
43  
44  
45

### 46 **Acknowledgement:**

47 The authors acknowledge the facilitation and assistance provided by AKF-P, AKHSP and AKRSP to carry  
48 out field data collection.  
49  
50  
51  
52  
53  
54

1  
2  
3  
4  
5  
6  
7  
8  
9  
10  
11  
12  
13  
14  
15  
16  
17  
18  
19  
20  
21  
22  
23  
24  
25  
26  
27  
28  
29  
30  
31  
32  
33  
34  
35  
36  
37  
38  
39  
40  
41  
42  
43  
44  
45  
46  
47  
48  
49  
50  
51  
52  
53  
54  
55  
56  
57  
58  
59  
60**Ethical consideration:**

Ethics approval for this study was granted by the Institutional Review Board of Aga Khan Health Services, Pakistan. Verbal informed consent was obtained from all the study participants, after explaining the objectives of the study. Confidentiality and anonymity was assured to all the participants. Data was kept under lock and key with the principal researcher.

**Authors' contributions**

BTS and SAK conceived the study design and instruments. AM supervised the data collection and helped in analyses. BTS and SAK drafted the successive drafts of paper. SA conducted the critical review and added the intellectual content to the paper. All authors read and approved the final draft.

**Funding:** The study was a part of larger project "Chitral Child Survival Program" funded by USAID.

**Competing Interests**

The authors declare that they have no competing interests.

**References**

- 
1. World Health Organization & UNICEF. Countdown to 2015 and beyond: fulfilling the health agenda for women and children. Geneva: 2014.
  2. Shaikh BT. Marching toward the Millennium Development Goals: What about health systems, health-seeking behaviours and health service utilization in Pakistan? *World Health & Popul* 2008; 10(2): 44-52.
  3. United Nations. Road map towards the implementation of the United Nations Millennium Declaration: report of the Secretary-General. New York: 2001.
  4. Sachs JD, McArthur JW. The Millennium Project: a plan for meeting the Millennium Development Goals. *Lancet* 2005; 365(9456):347-53.

- 
5. Titaley CR, Hunter CL, Dibley MJ, Heywood P. Why do some women still prefer traditional birth attendants and home delivery? A qualitative study on delivery care services in West Java Province, Indonesia. *BMC Pregnancy Childbirth* 2010; 10:43.
  6. Lassi ZS, Haider BA, Bhutta ZA. Community-based intervention packages for reducing maternal and neonatal morbidity and mortality and improving neonatal outcomes. *Cochrane Database Syst Rev* 2010; 11: CD007754.
  7. Garces A, McClure EM, Chomba E, Patel A, Pasha O, Tshetu A. Home birth attendants in low income countries: who are they and what do they do? *BMC Pregnancy Childbirth* 2012; 12:34.
  8. Byrne A, Morgan A. How the integration of traditional birth attendants with formal health systems can increase skilled birth attendance. *Int J Gynaecol Obstet* 2011; 115(2):127-34.
  9. Ray AM, Salihu HM. The impact of maternal mortality interventions using traditional birth attendants and village midwives. *J Obstet Gynaecol* 2004; 24(1):5-11.
  10. Agarwal S, Sethi V, Srivastava K, Jha PK, Baqui AH. Birth preparedness and complication readiness among slum women in Indore City, India. *J Health Nutr Popul* 2010; 28(4): 383-391.
  11. Wilson A, Gallos ID, Plana N, Lissauer D, Khan KS, Zamora J, et al. Effectiveness of strategies incorporating training and support of traditional birth attendants on perinatal and maternal mortality: meta-analysis. *BMJ* 2011; 343:d7102.
  12. Sibley LM, Sipe TA. Transition to skilled birth attendance: Is there a future role for trained traditional birth attendants. *J Health Popul Nutr* 2006; 24(4):472-8.
  13. Bisika T. The effectiveness of the TBA programme in reducing maternal mortality and morbidity in Malawi. *East Afr J Public Health* 2008; 5(2):103–10.
  14. Chalo RN, Salihu HM, Nabukera S, Zirabamuzaale C. Referral of high-risk pregnant mothers by trained traditional birth attendants in Buikwe County, Mukono District, Uganda. *J Obstet Gynaecol* 2005; 25(6):554-7.
  15. Temesgen TM, Umer JY, Buda DS, Haregu TN. Contribution of traditional birth attendants to the formal health system in Ethiopia: the case of Afar region. *Pan Afr Med J* 2012; 13(Suppl 1):15.
  16. Wajid A, Rashid Z, Mir AM. Initial assessment of Community Midwives in rural Pakistan. PAIMAN. JSI Research and Training Institute, Inc; Islamabad: 2010.

17. Concern Worldwide. Examining the role of traditional birth attendants in the continuum of care in Sierra Leone. Innovations for maternal, newborn and child health. Policy Brief. Concern Worldwide; New York: 2013.
18. National Institute of Population Studies and Macro International Inc. Pakistan Demographic and Health Survey (PDHS) 2006–07. Government of Pakistan; Islamabad: 2008.
19. Government of Pakistan. PC1 National Maternal Newborn & Child health Program 2006-2012. Ministry of Health, Government of Pakistan; Islamabad: 2009.
20. Research and Development Solutions. The community midwives program in Pakistan. Policy Brief Series No 20. Islamabad: 2012.
21. Department of Health. District health profile-Chitral. Government of Khyber Pakhtunkhwa; Peshawar: 2014.
22. Chesney M, Davies S. Women's birth experiences in Pakistan – the importance of the Dai. The Royal College of Midwives. *Evid Based Midwifery* 2005; 3(1):26-32.
23. Owolabi OO, Glenton C, Lewin S, Pakenham-Walsh N. Stakeholder views on the incorporation of traditional birth attendants into the formal health systems of low-and middle-income countries: a qualitative analysis of the HIFA2015 and CHILD2015 email discussion forums. *BMC Pregnancy Childbirth* 2014; 14:118.
24. Sarfraz M, Hamid S. Challenges in delivery of skilled maternal care-Experiences of community midwives in Pakistan. *BMC Pregnancy Childbirth* 2014; 14:59.
25. Research and Advocacy Fund/Children First. How far can I go? Social mobility of CMWs in Azad Kashmir. Islamabad: 2012.
26. Morrison J, Tumbahangphe KM, Budhathoki B, Neupane R, Sen A, Dahal K, et al. Community mobilization and health management committee strengthening to increase birth attendance by trained health workers in rural Makwanpur, Nepal: study protocol for a cluster randomized controlled trial. *Trials* 2011; 12:128.
27. Walraven G, Blum J, Dampha Y, Sowe M, Morison L, Winikoff B, et al. Misoprostol in the management of the third stage of labour in the home delivery setting in rural Gambia: a randomized controlled trial. *Br J Obstet Gynaecol* 2005; 112: 1277-83.

- 
- 1  
2  
3  
4  
5  
6  
7  
8  
9  
10  
11  
12  
13  
14  
15  
16  
17  
18  
19  
20  
21  
22  
23  
24  
25  
26  
27  
28  
29  
30  
31  
32  
33  
34  
35  
36  
37  
38  
39  
40  
41  
42  
43  
44  
45  
46  
47  
48  
49  
50  
51  
52  
53  
54  
55  
56  
57  
58  
59  
60
28. Mobeen N, Durocher J, Zuberi N, Jahan N, Blum J, Wasim S, et al. Administration of misoprostol by trained traditional birth attendants to prevent postpartum hemorrhage in homebirths in Pakistan: a randomized placebo-controlled trial. *BJOG* 2011; 118(3):353-61.
29. Shaikh BT, Haran D, Hatcher J. Women's social position and health-seeking behaviors: Is the health care system accessible and responsive in Pakistan? *Health Care Women Int* 2008; 29:945-959.
30. Gill CJ, Phiri-Mazala G, Guerina NG, Kasimba J, Mulenga C, MacLeod WB. Effect of training traditional birth attendants on neonatal mortality (Lufwanyama Neonatal Survival Project): randomized controlled study. *BMJ* 2011; 342:d346.
31. Falle TY, Mulany LC, Thatte N, Khattry SK, LeClerg SC, Darmstadt GL, et al. Potential role of traditional birth attendants in neonatal healthcare in rural southern Nepal. *J Health Popul Nutr* 2009; 27(1): 53–61.
